# Supplementary material
Source: publisher figshare collection journal article supplement (https://tandf.figshare.com/ndownloader/files/17426978)
Supplement: Supplementary file 1 [file 17426978]

**8. Online Appendix (Supplementary Material)**

**Additional Information on Data:**

Our dataset captures reform directions of morality policy reforms in 16 West European countries consisting of Austria, Belgium, Denmark, Germany, Ireland, Italy, Netherlands, Portugal, Spain, Switzerland, Finland, France, Greece, Norway, Sweden, and the United Kingdom; or better England and Wales. It was compiled within the project ‘Comparative Analysis of Moral Policy Change’ (MORAPOL),2011–2016. To capture morality policy developments, this project searched, found, and coded legislative documents. To do so, the project made use of country experts that helped to find and understand relevant documents as well as the legal situation. For each policy field (abortion, euthanasia, homosexuality, same-sex partnership, pornography, and prostitution), we asked country experts to fill out a detailed questionnaire on the respective laws in place in 1959 and all modifications and reforms thereafter until 2010. The results were subsequently validated and cross-checked using all available sources, including news reports, secondary literature, legal commentary, and primary legislative documents. Since we focus analytically on democratic policy-making, we exclude Spain and Portugal until (incl.) 1975 and 1976 respectively as well as Greece between 1968 and 1973 (incl.).

Figure A1: Morality Policy Reforms by Area 1960 – 2010


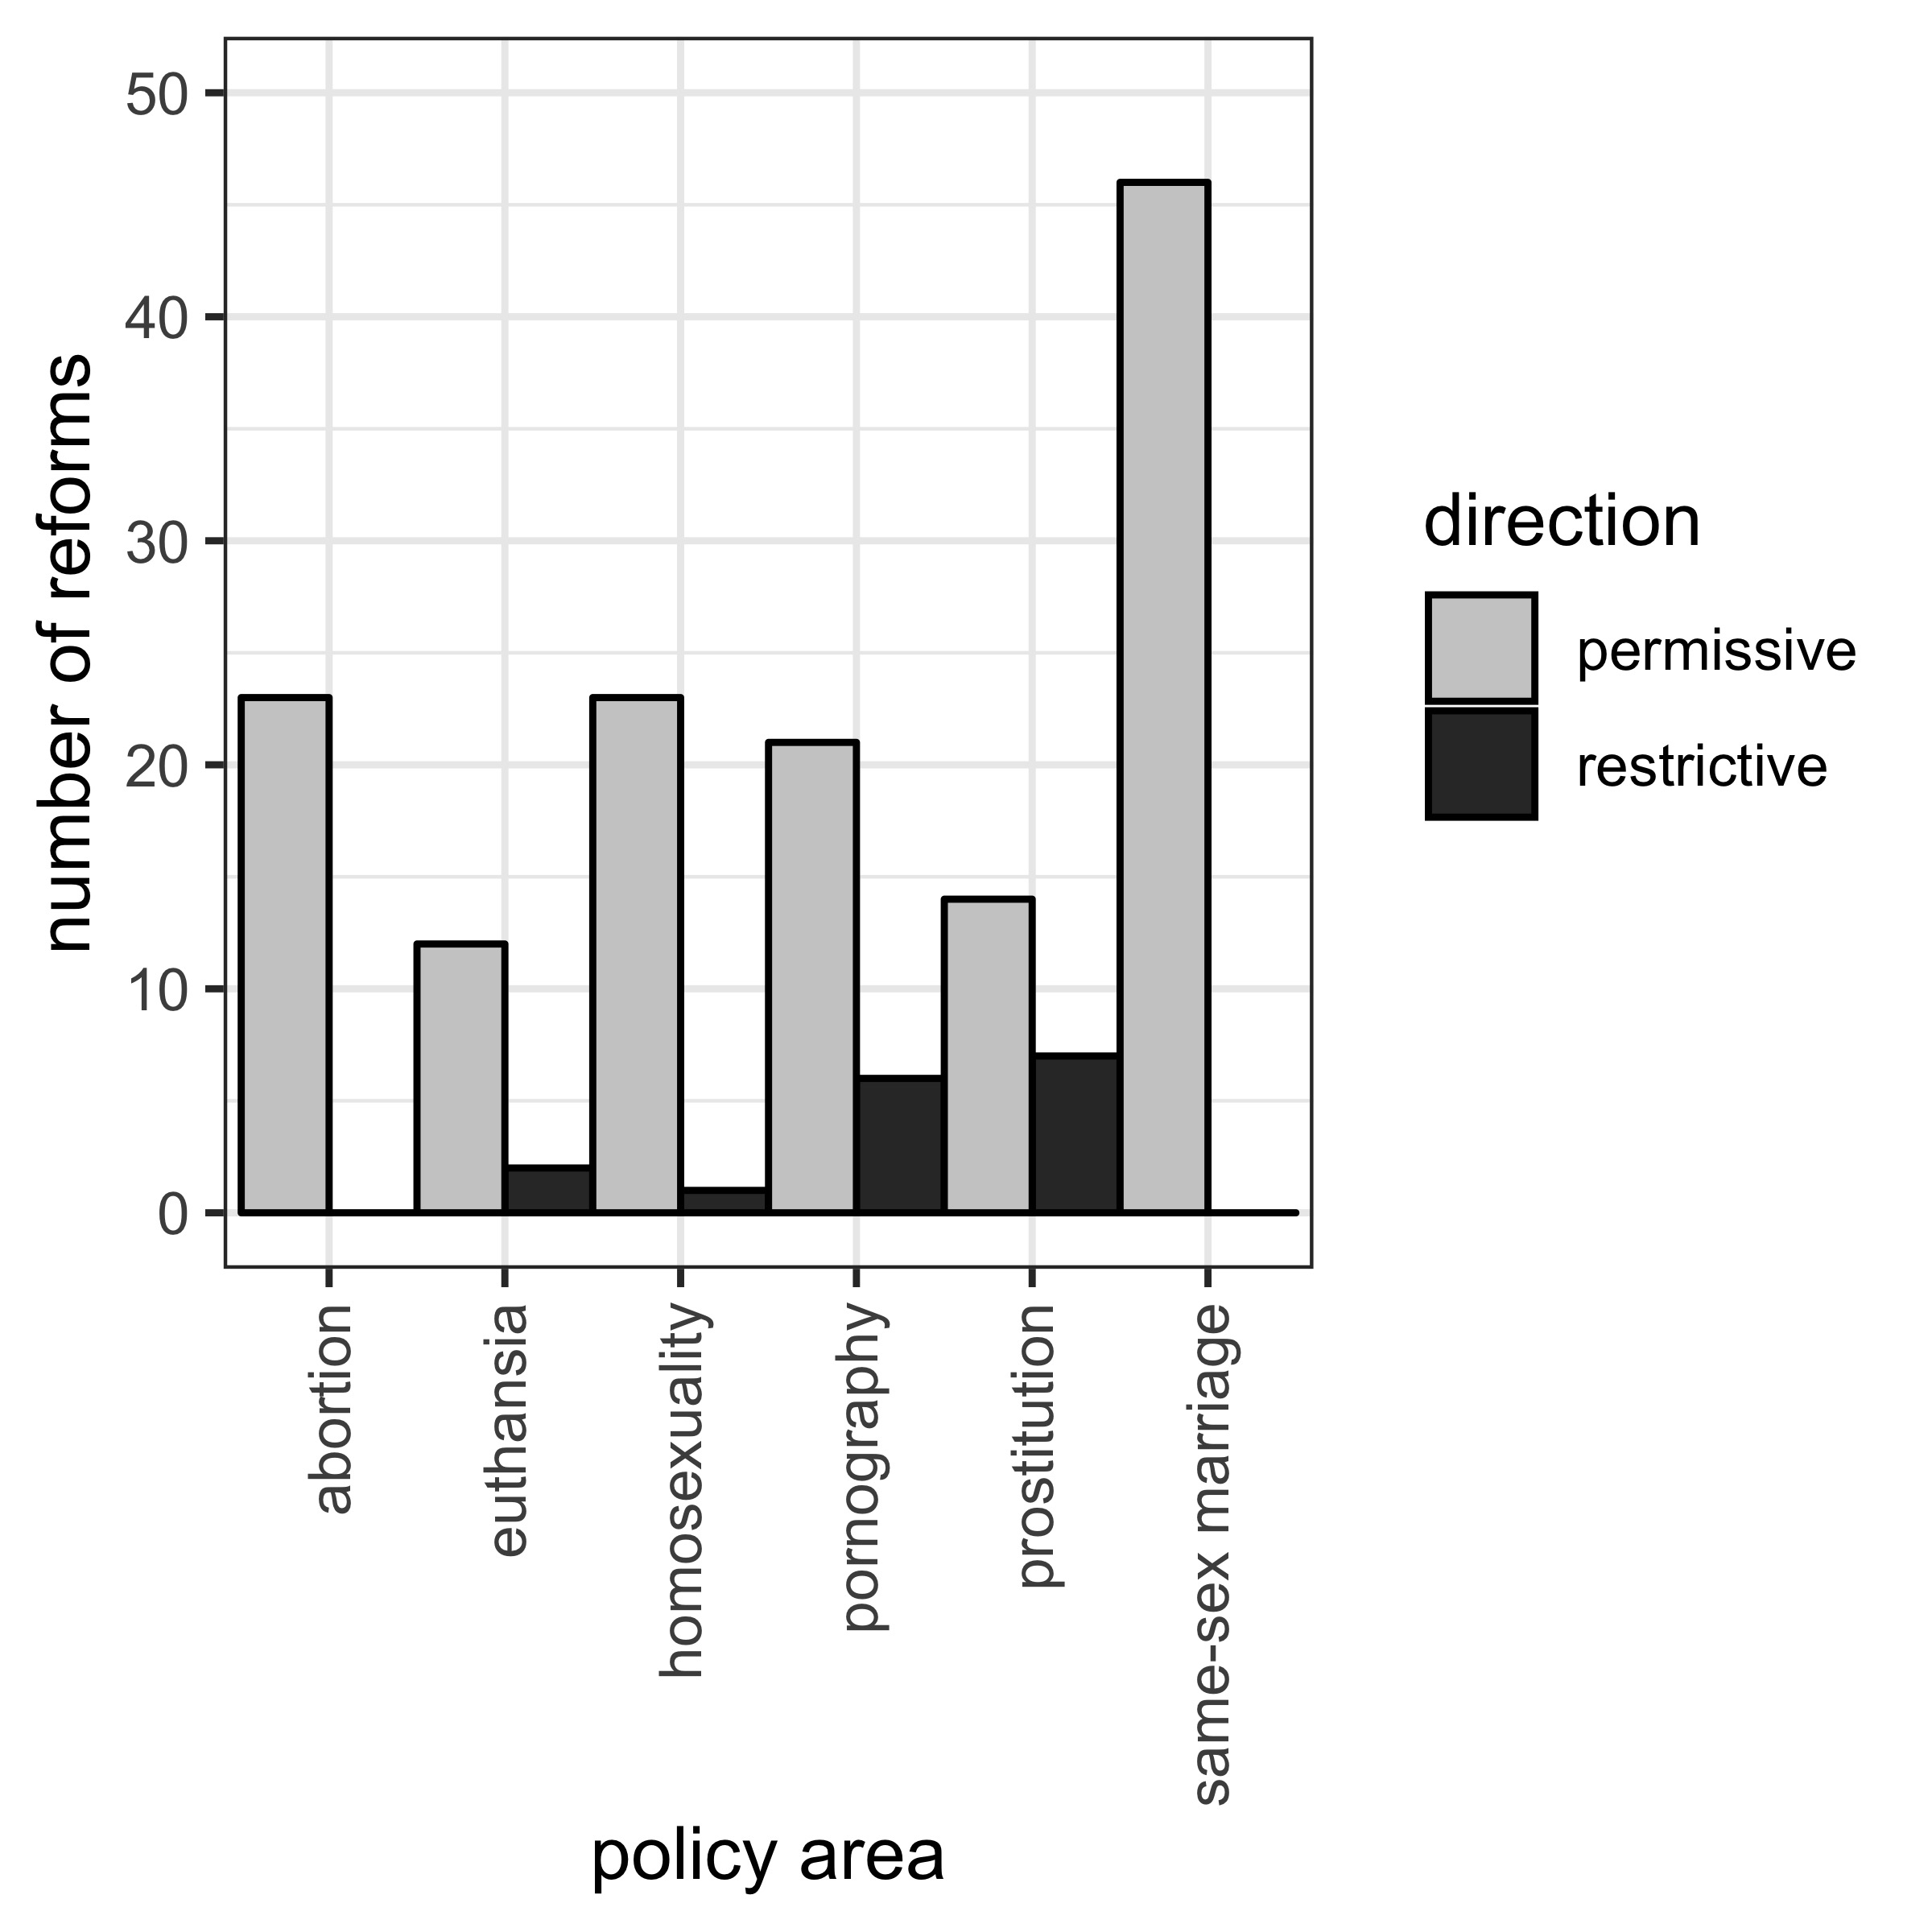


Figure A2: Morality Policy Reforms over Time


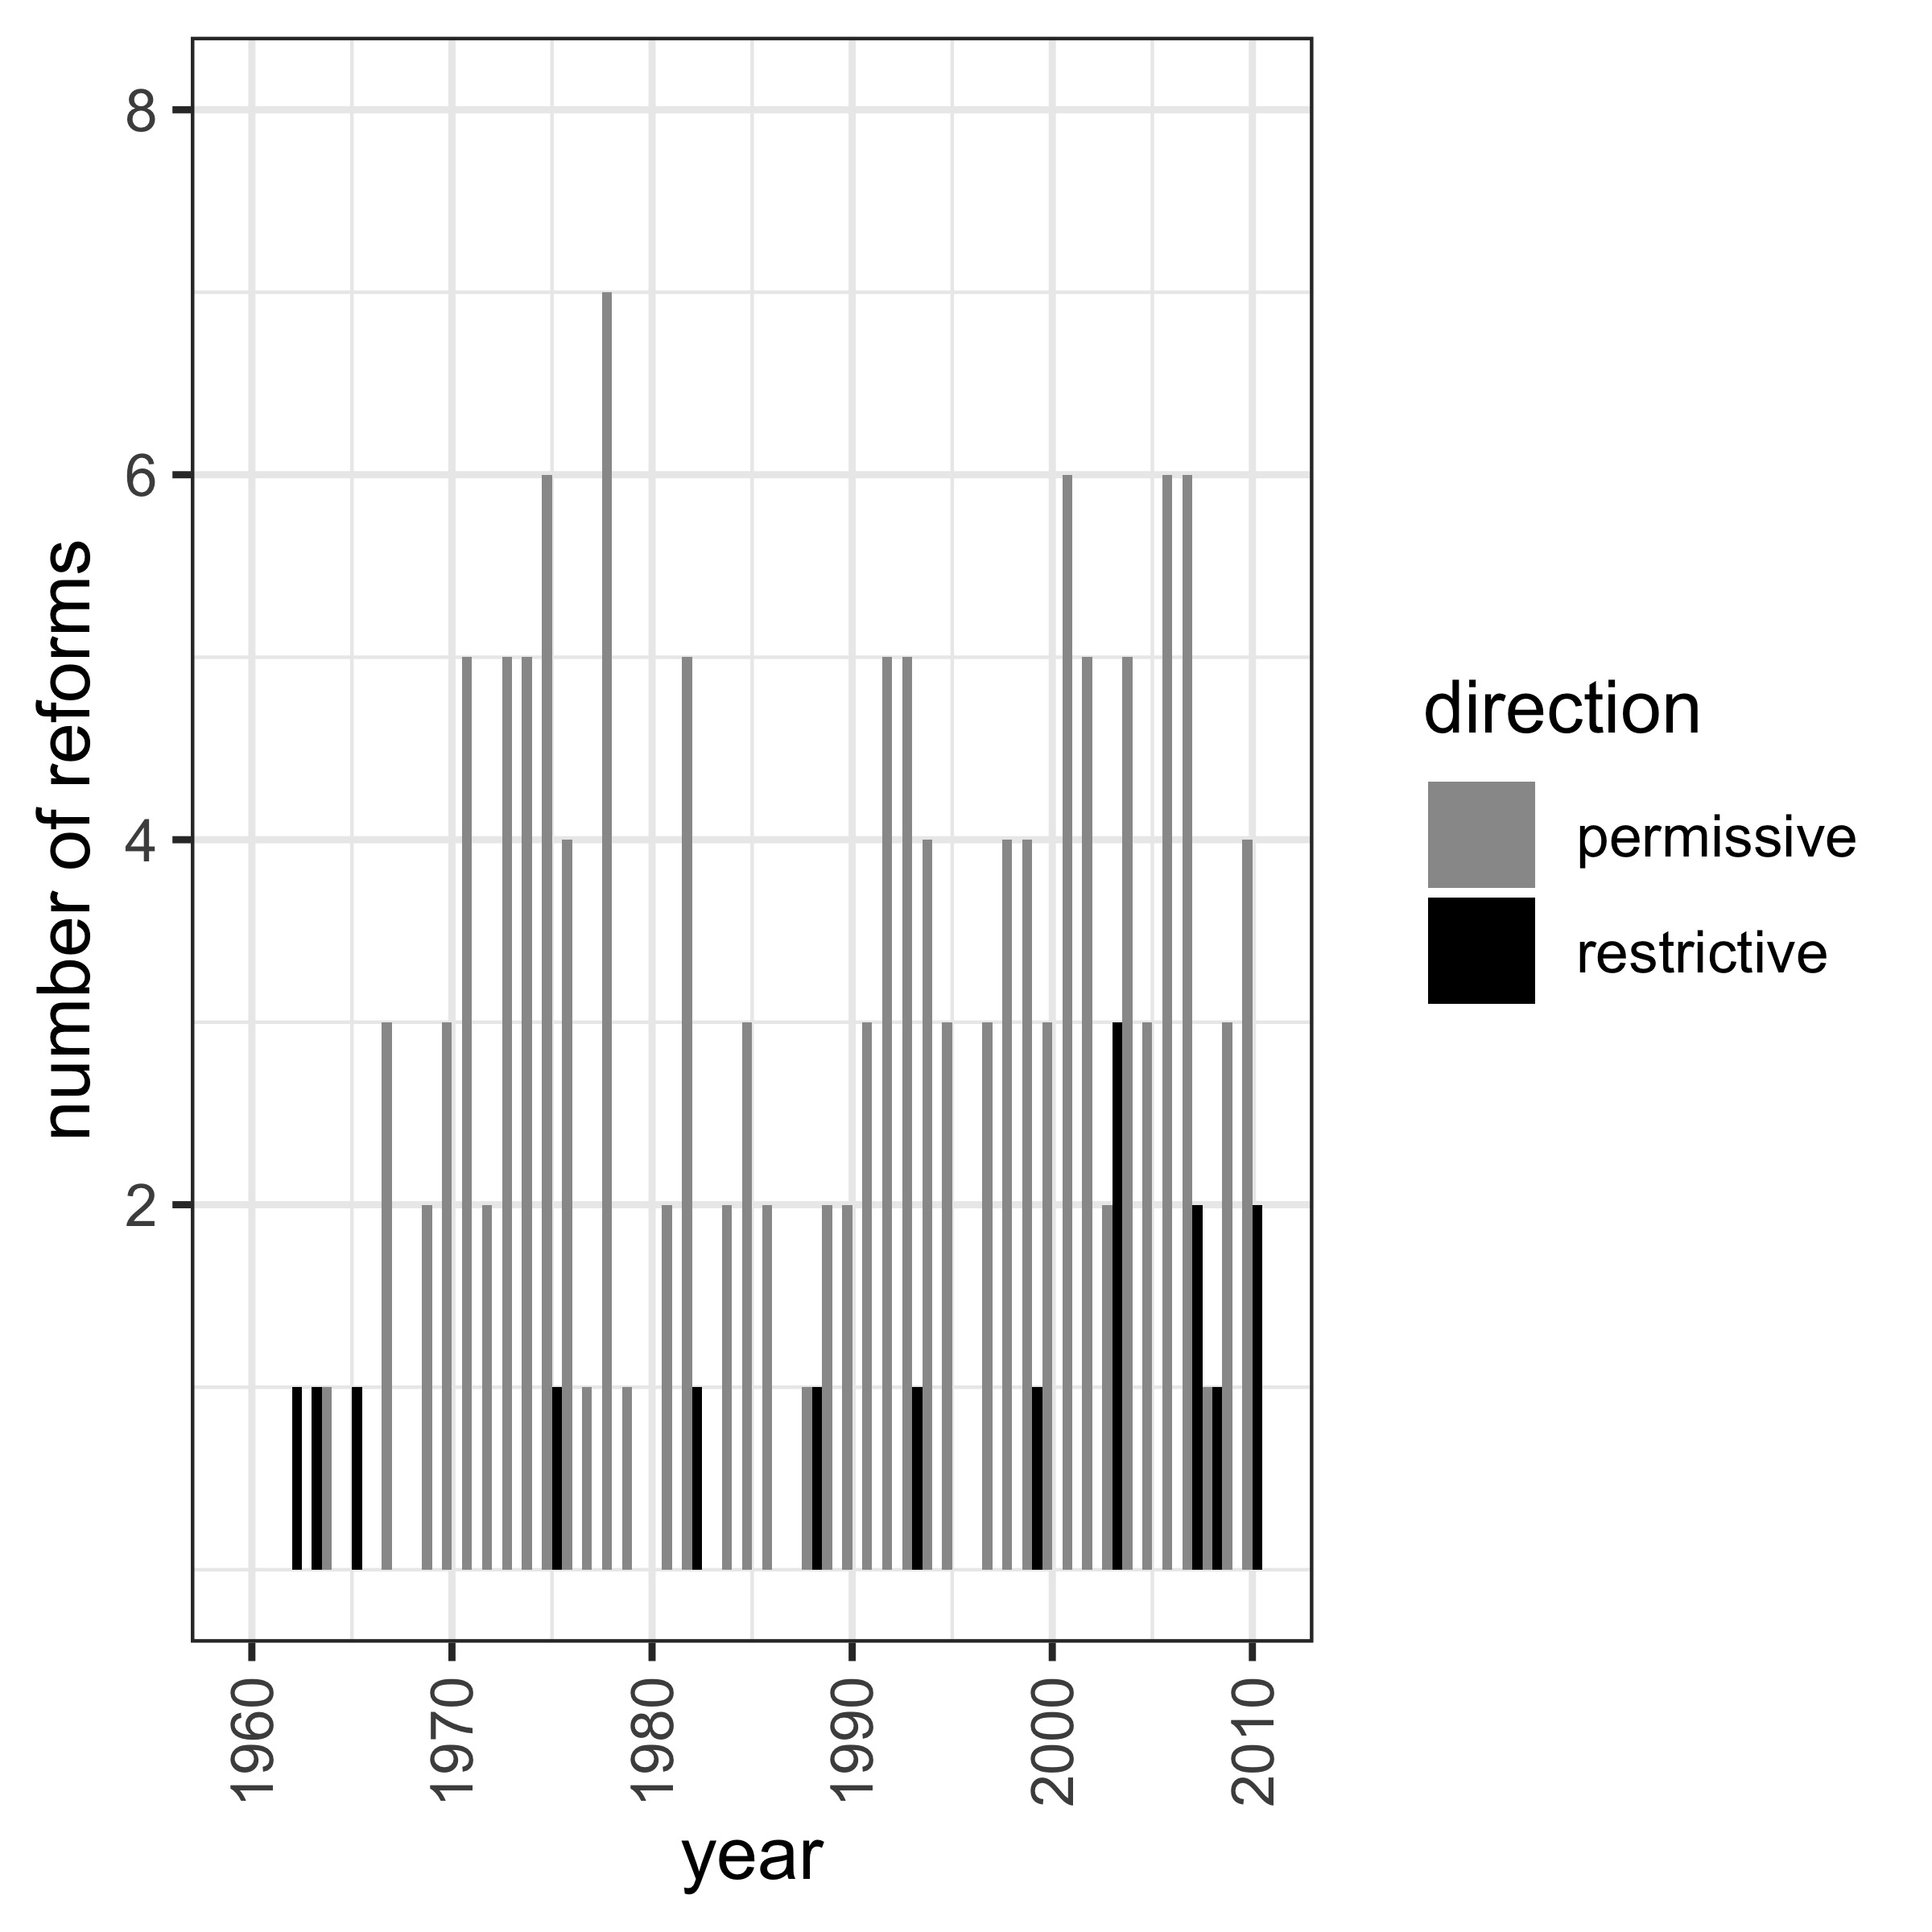


Figure A2 indicates the year in which permissive and restrictive reforms have taken place within the country group we analyse. While we observe more permissive reforms in the 1970s than in the 1960s, there is no clear longitudinal cluster of reform activity. Permissive reforms as well as restrictive reforms occur throughout the whole observation period.

**Table A1: Secular World – Liberalization (H1a)**

**Table A2.1: Secular World – Restrictive Reform (H1b)**

**Table A2.2: Secular World – Restrictive Reform (H1b)**

**Table A2.3: Secular World – Restrictive Reform (H1b)**

**Table A2.4: Secular World – Restrictive Reform (H1b)**

**Table A2.5: Secular World – Restrictive Reform (H1b)**

**Table A2.6: Secular World – Restrictive Reform (H1b)**

**Table A3.1: Religious World – Restrictive Reform (H2)**

**Table A3.2: Religious World – Restrictive Reform (H2)**

**Table A3.3: Religious World – Restrictive Reform (H2)**

**Table A3.4: Religious World – Restrictive Reform (H2)**

**Table A3.5: Religious World – Restrictive Reform (H2)**

**Table A3.6: Religious World – Restrictive Reform (H2)**

**Table A3.7: Religious World – Restrictive Reform (H2)**

**Table A4: Religious World – Liberalization (H3)**

**Table A5.1: Religious World without Italy and Ireland**

**Table A5.2: Secular World with Italy and Ireland**

**Table A6.1: Descriptive Statistics – Secular World**

**Table A6.2: Descriptive Statistics – Religious World**

**Figure A3: Strength of Conservative Parties for Reforms (Secular World)**

**
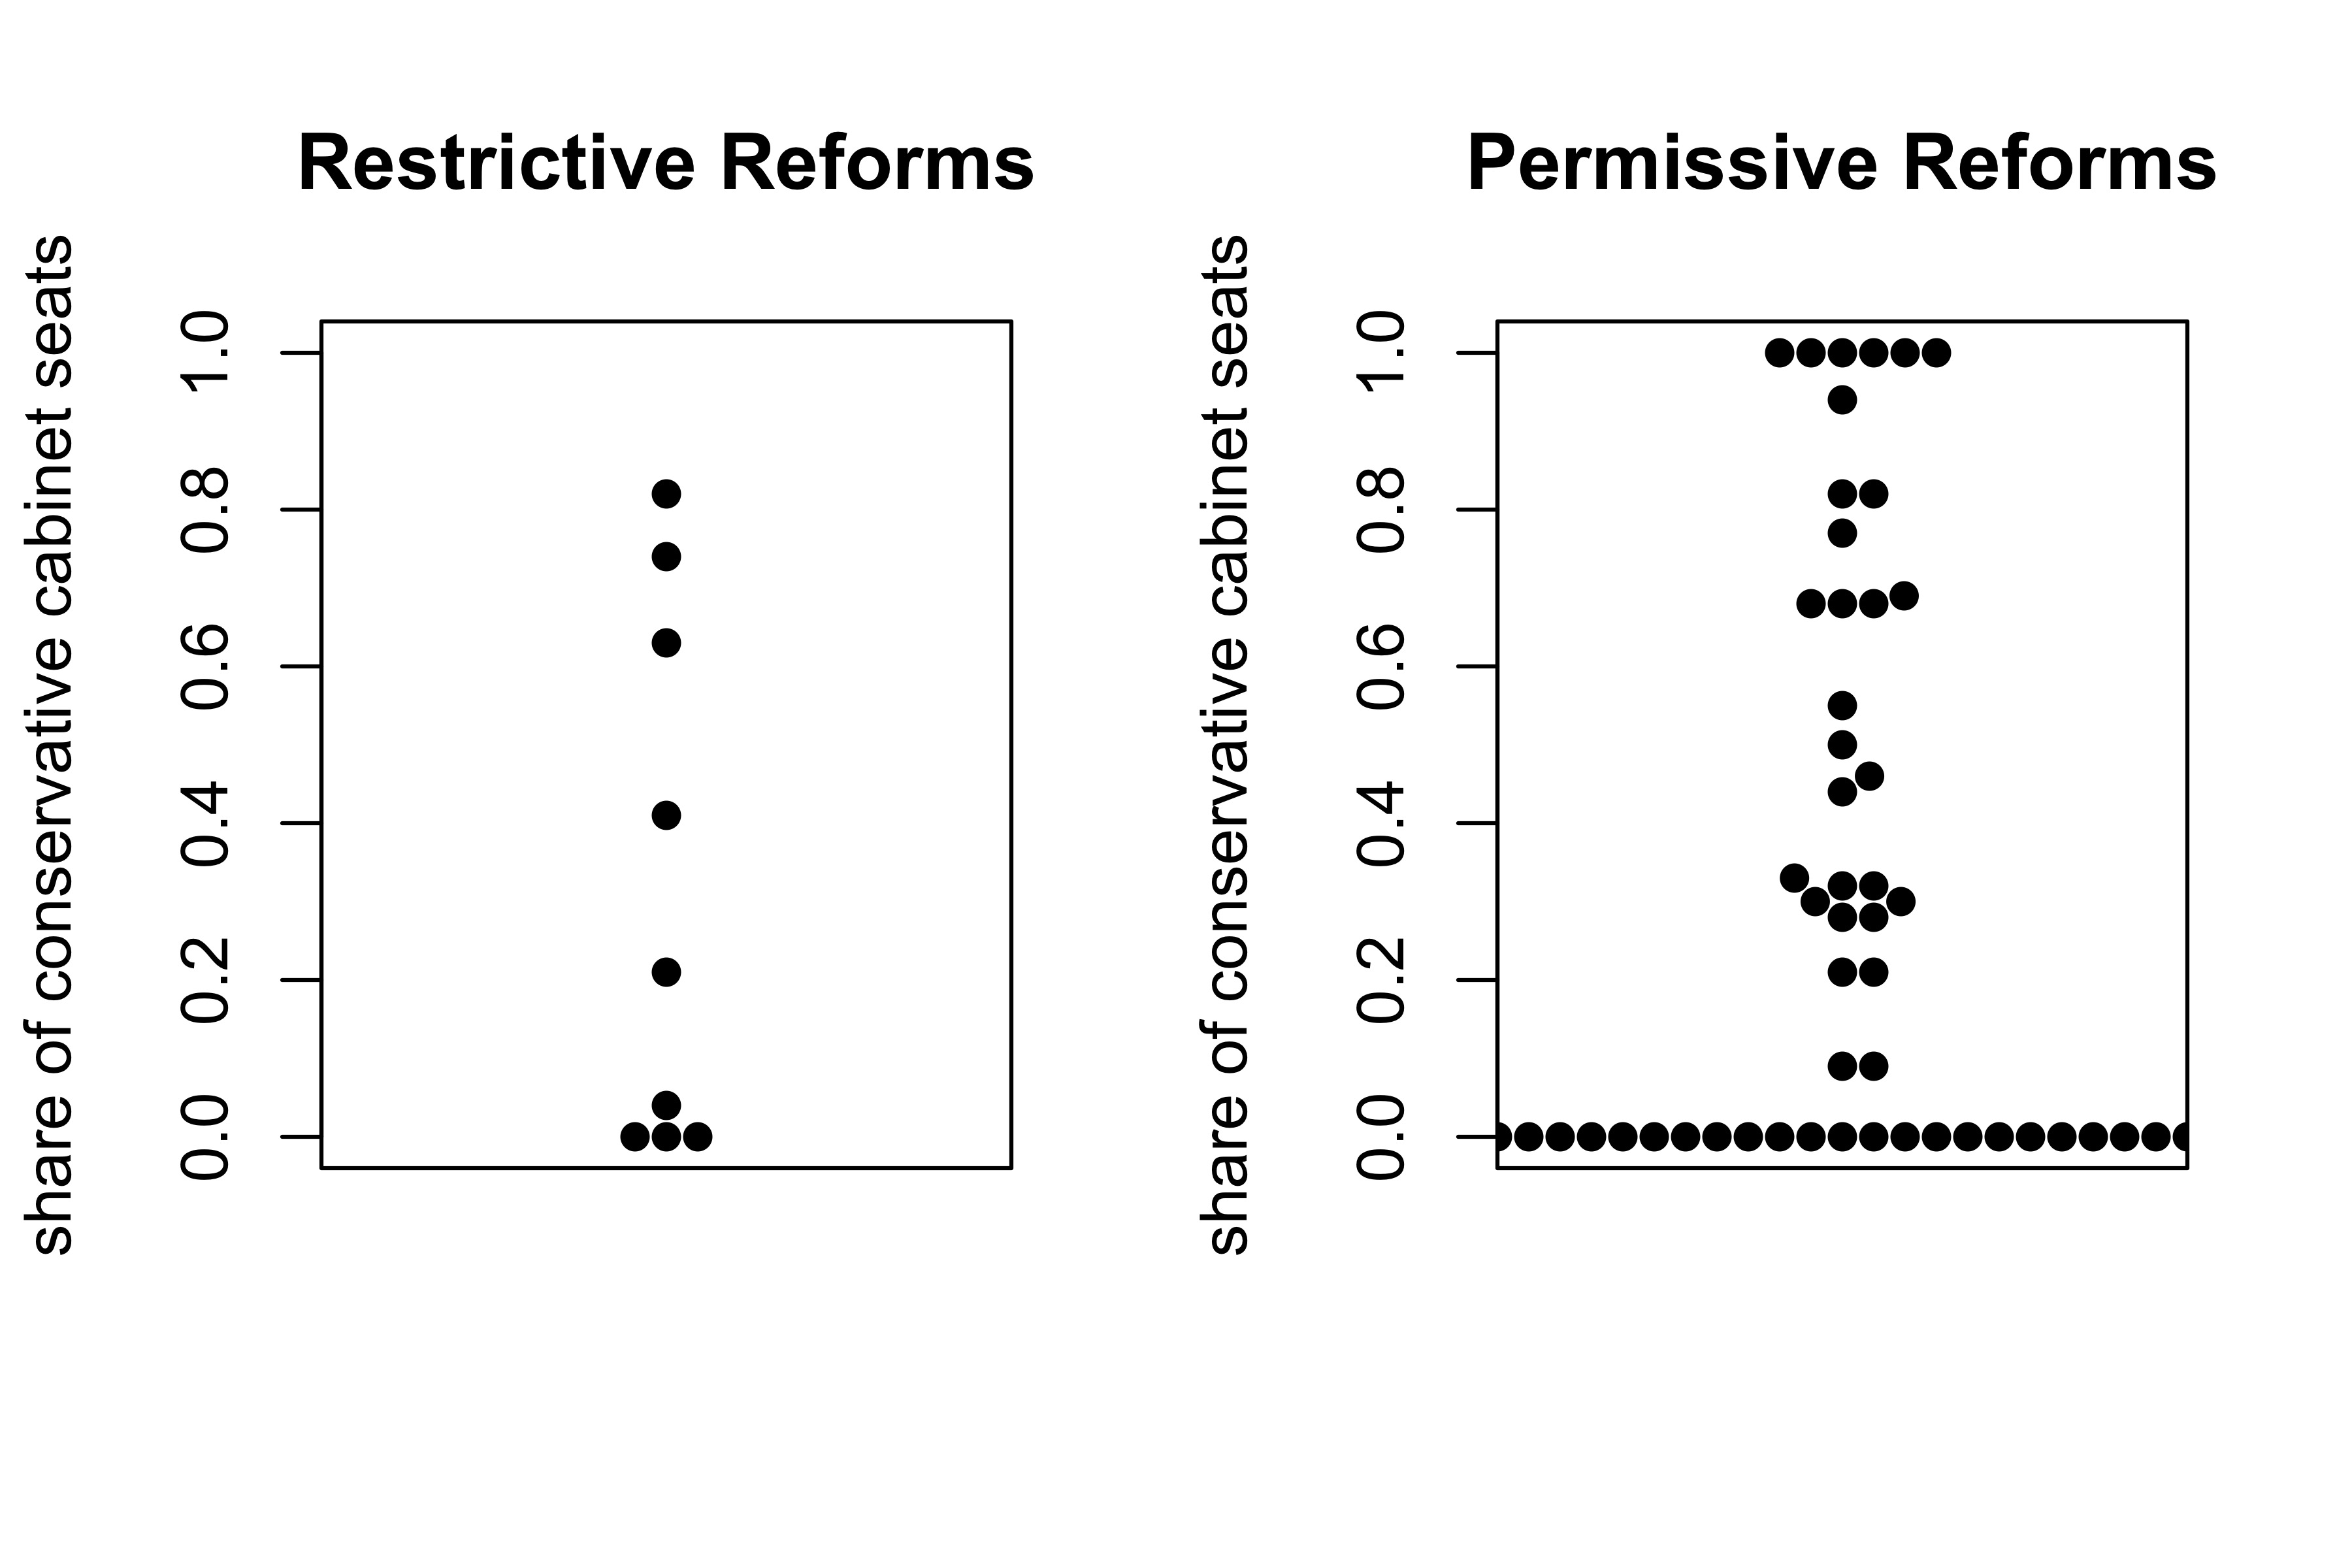
**

**Figure A4: Strength of Conservative Parties for Reforms (Religious World)**

**
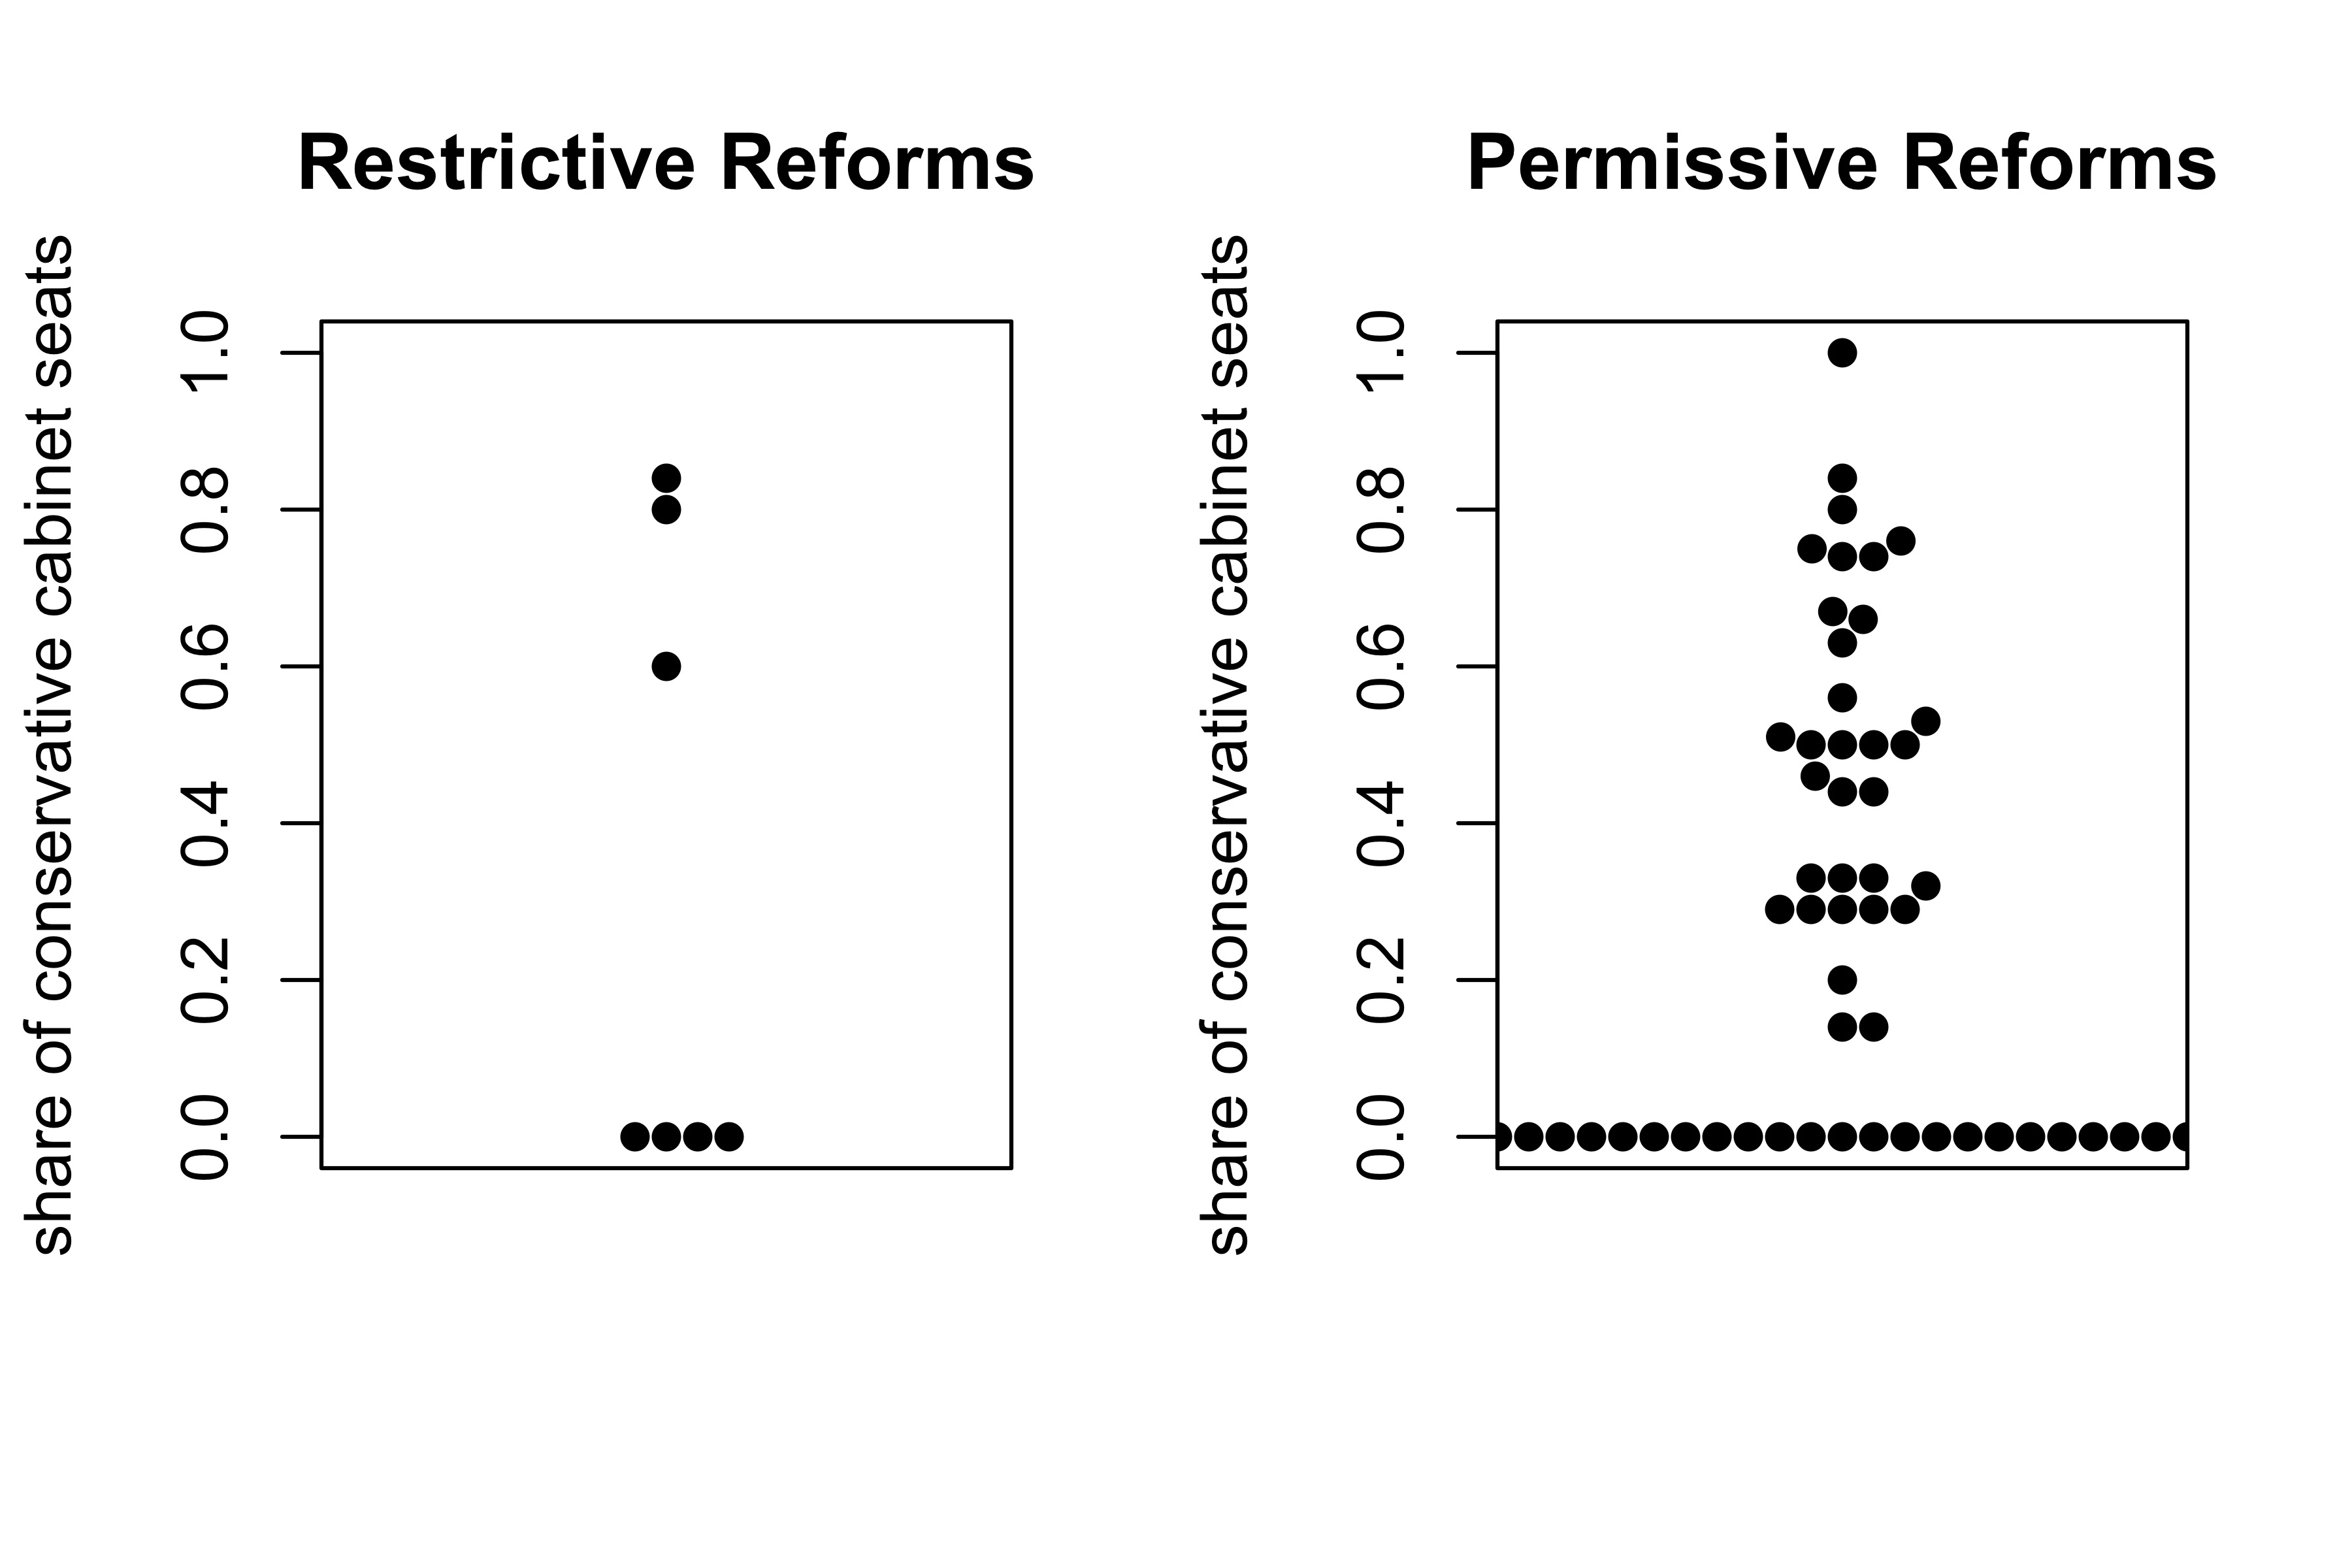
**

**Figure A5: Strength of Conservative Parties for Permissive Reforms (Religious World)**

**
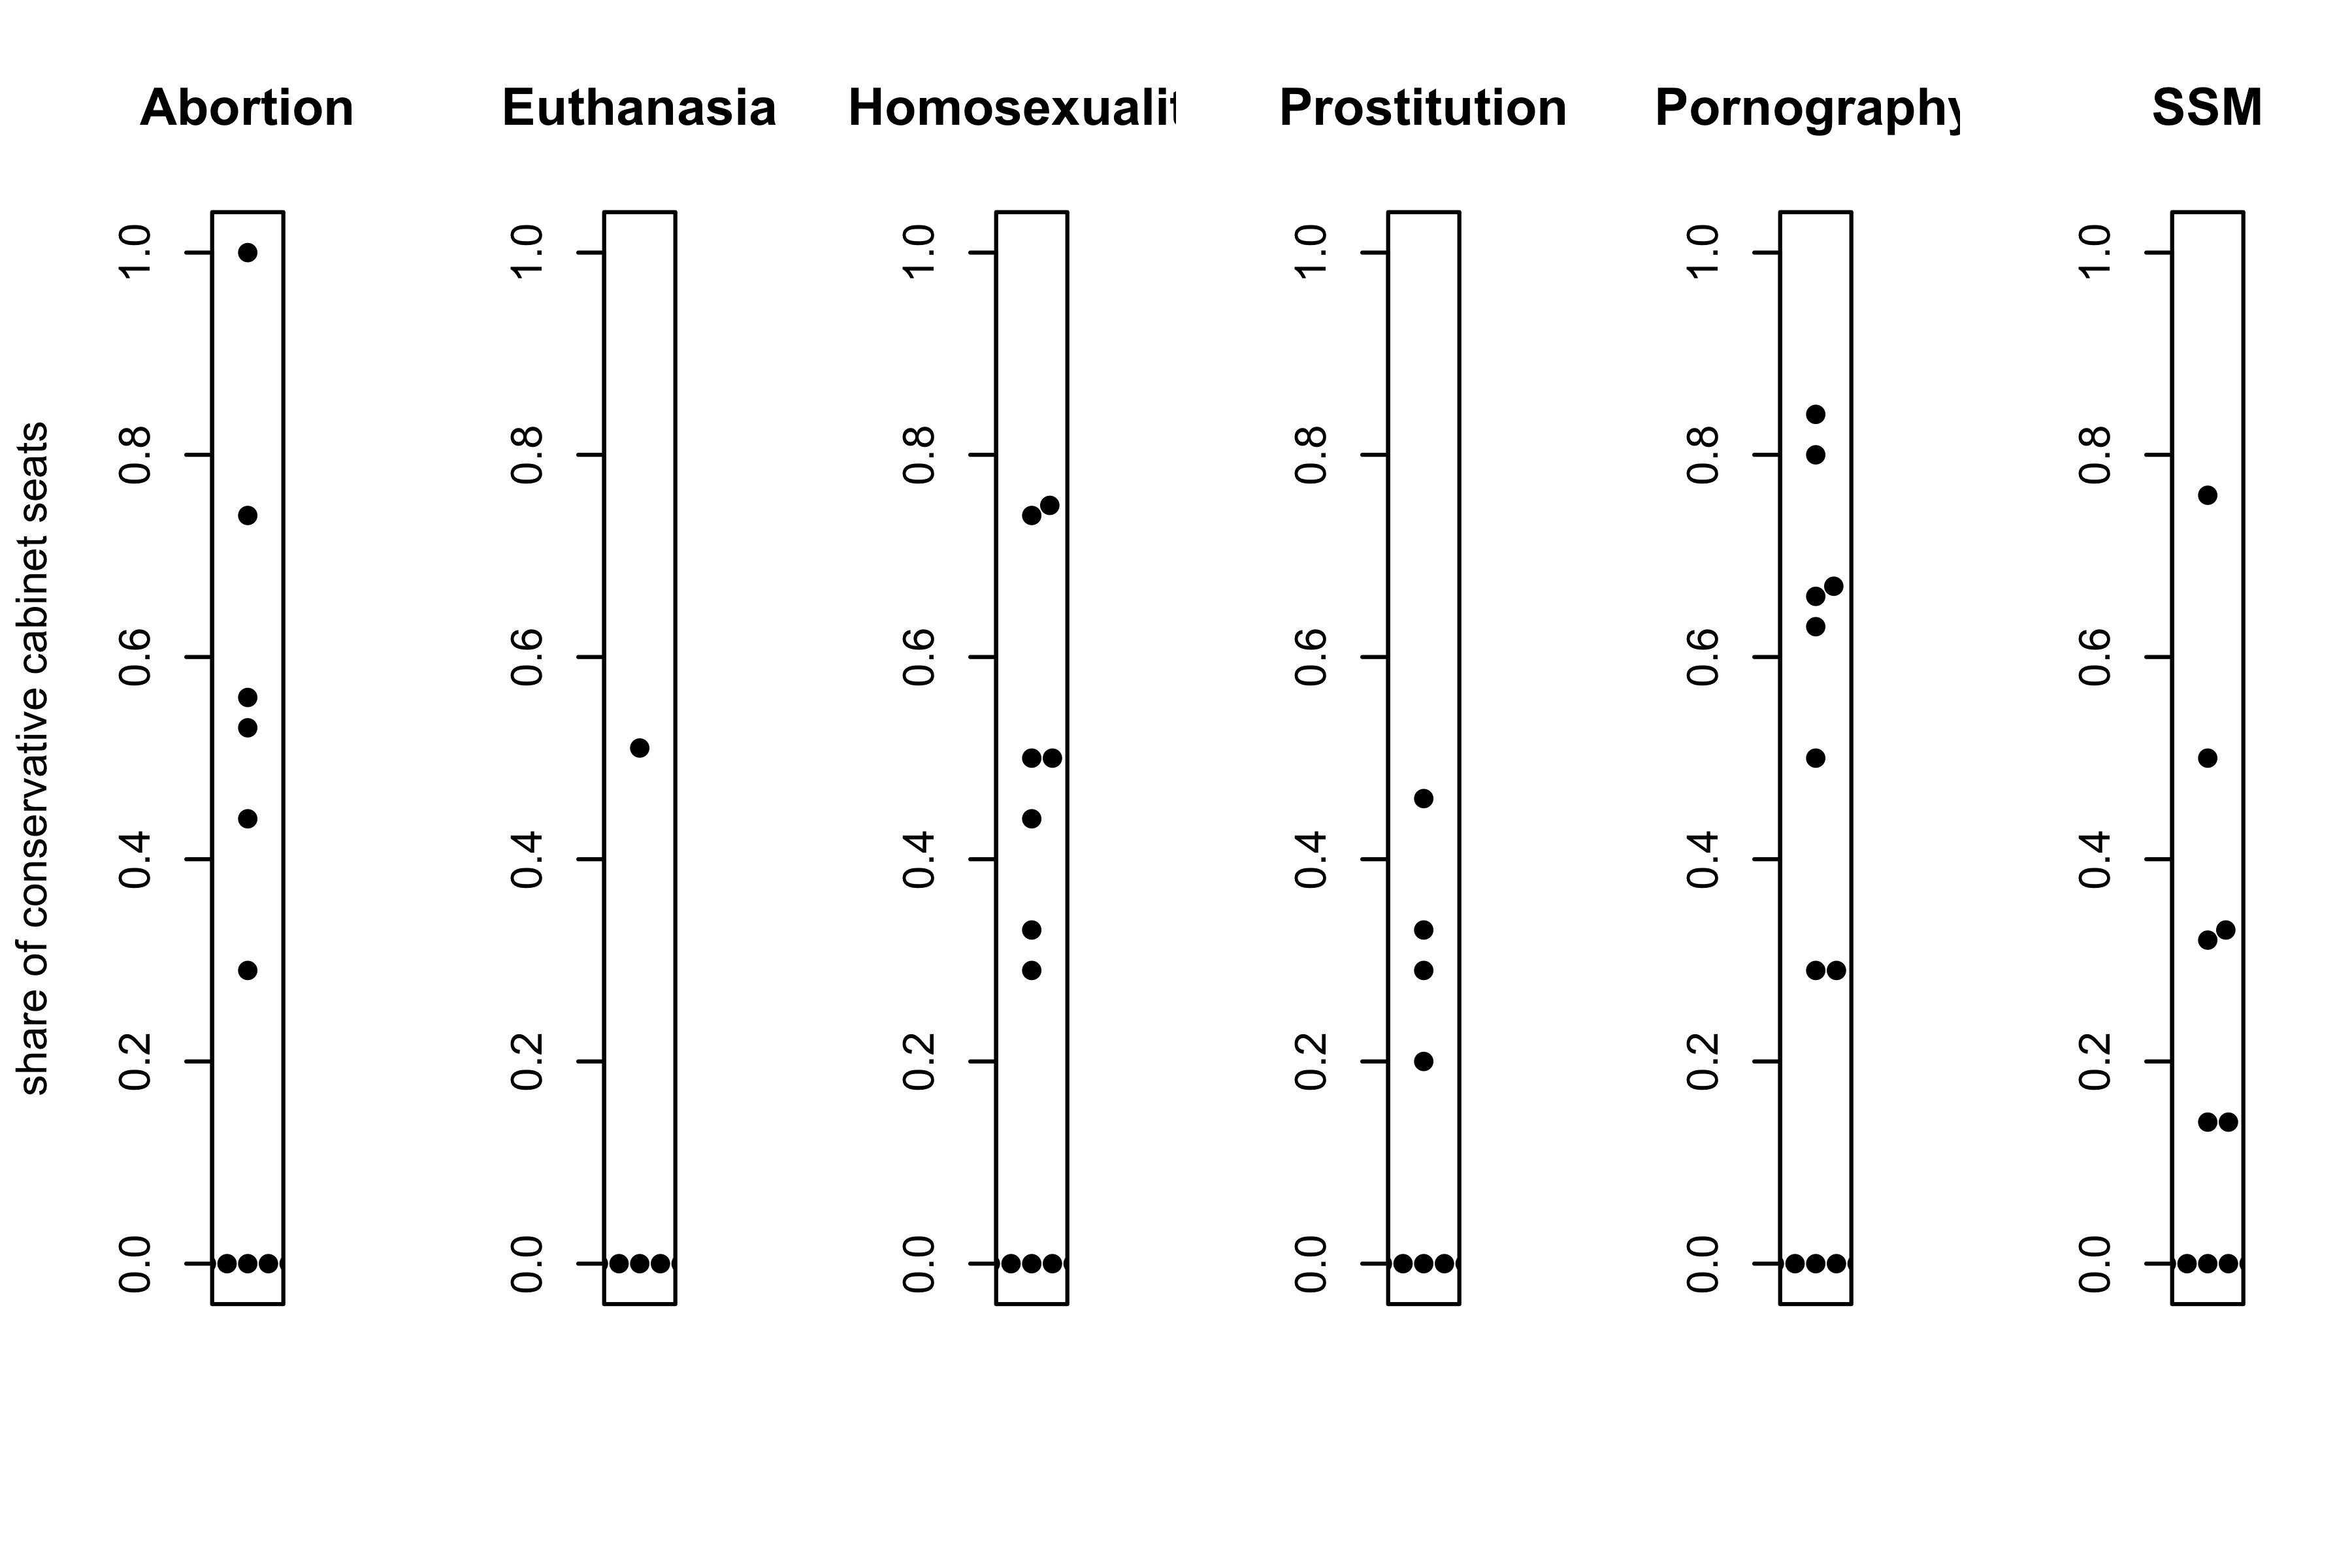
**

**Figure A6: Strength of Conservative Parties for Restrictive Reforms (Religious World)**

**
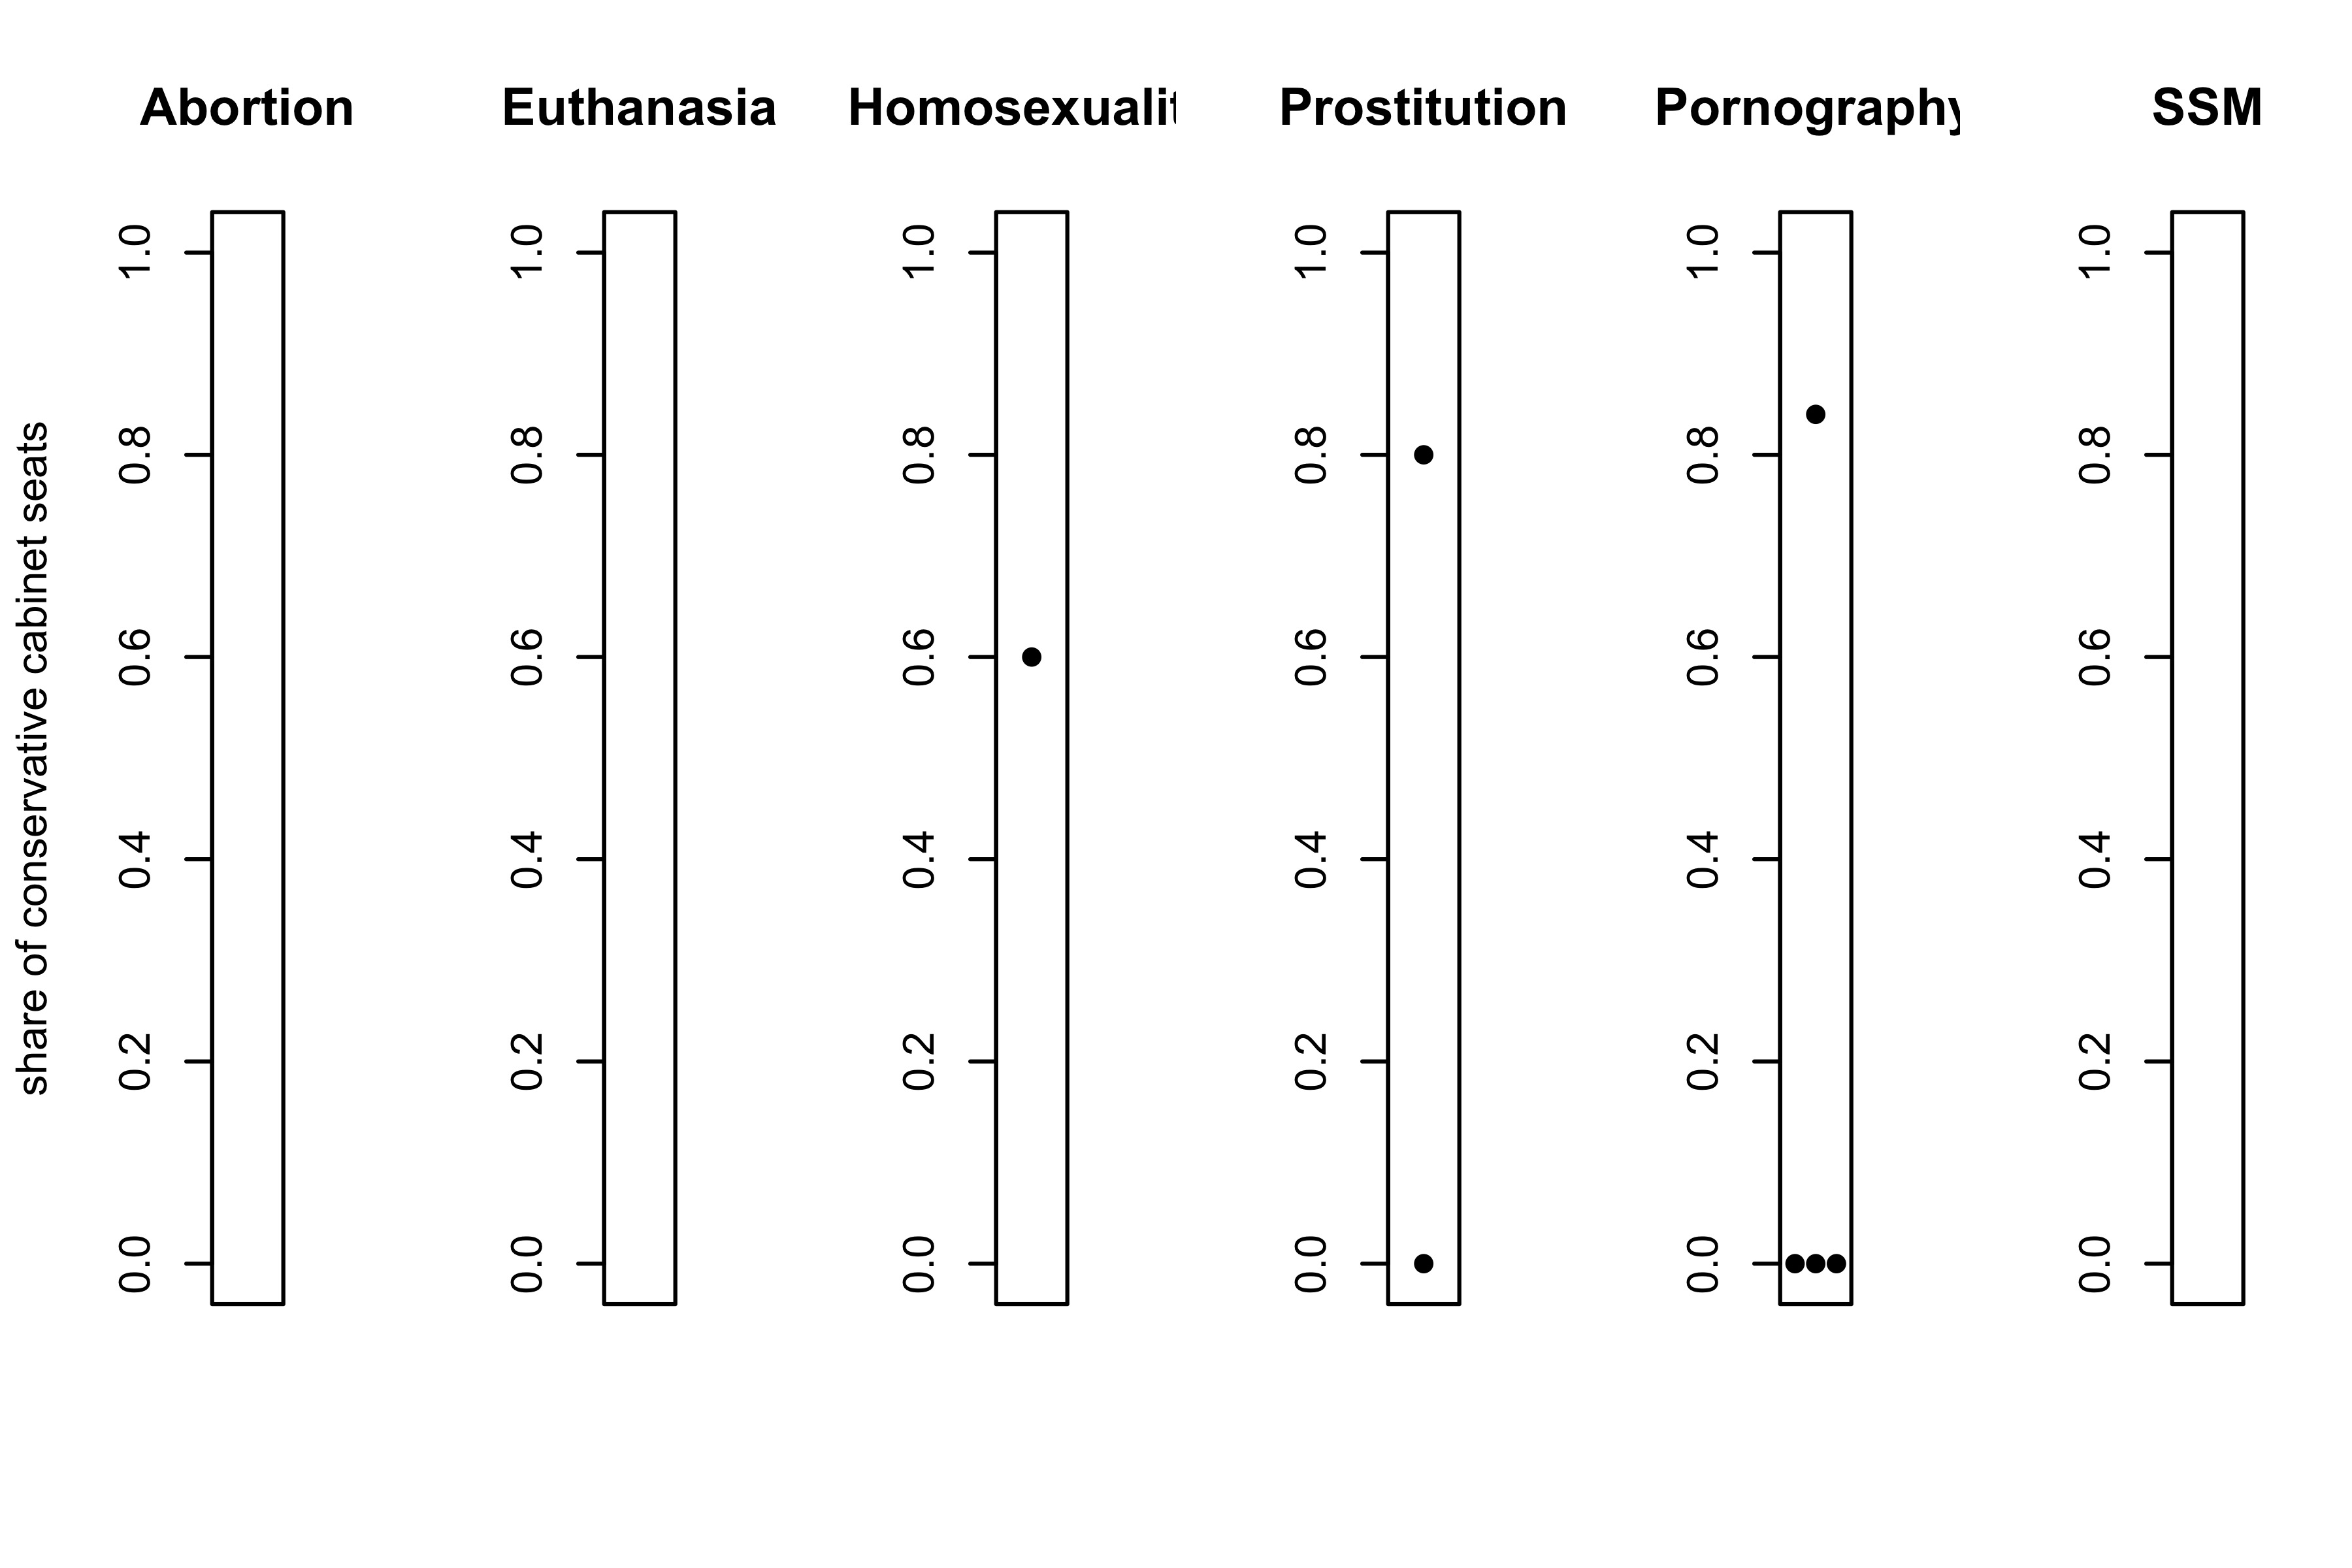
**

**Figure A7: Strength of Conservative Parties for Permissive Reforms (Secular World)**

**
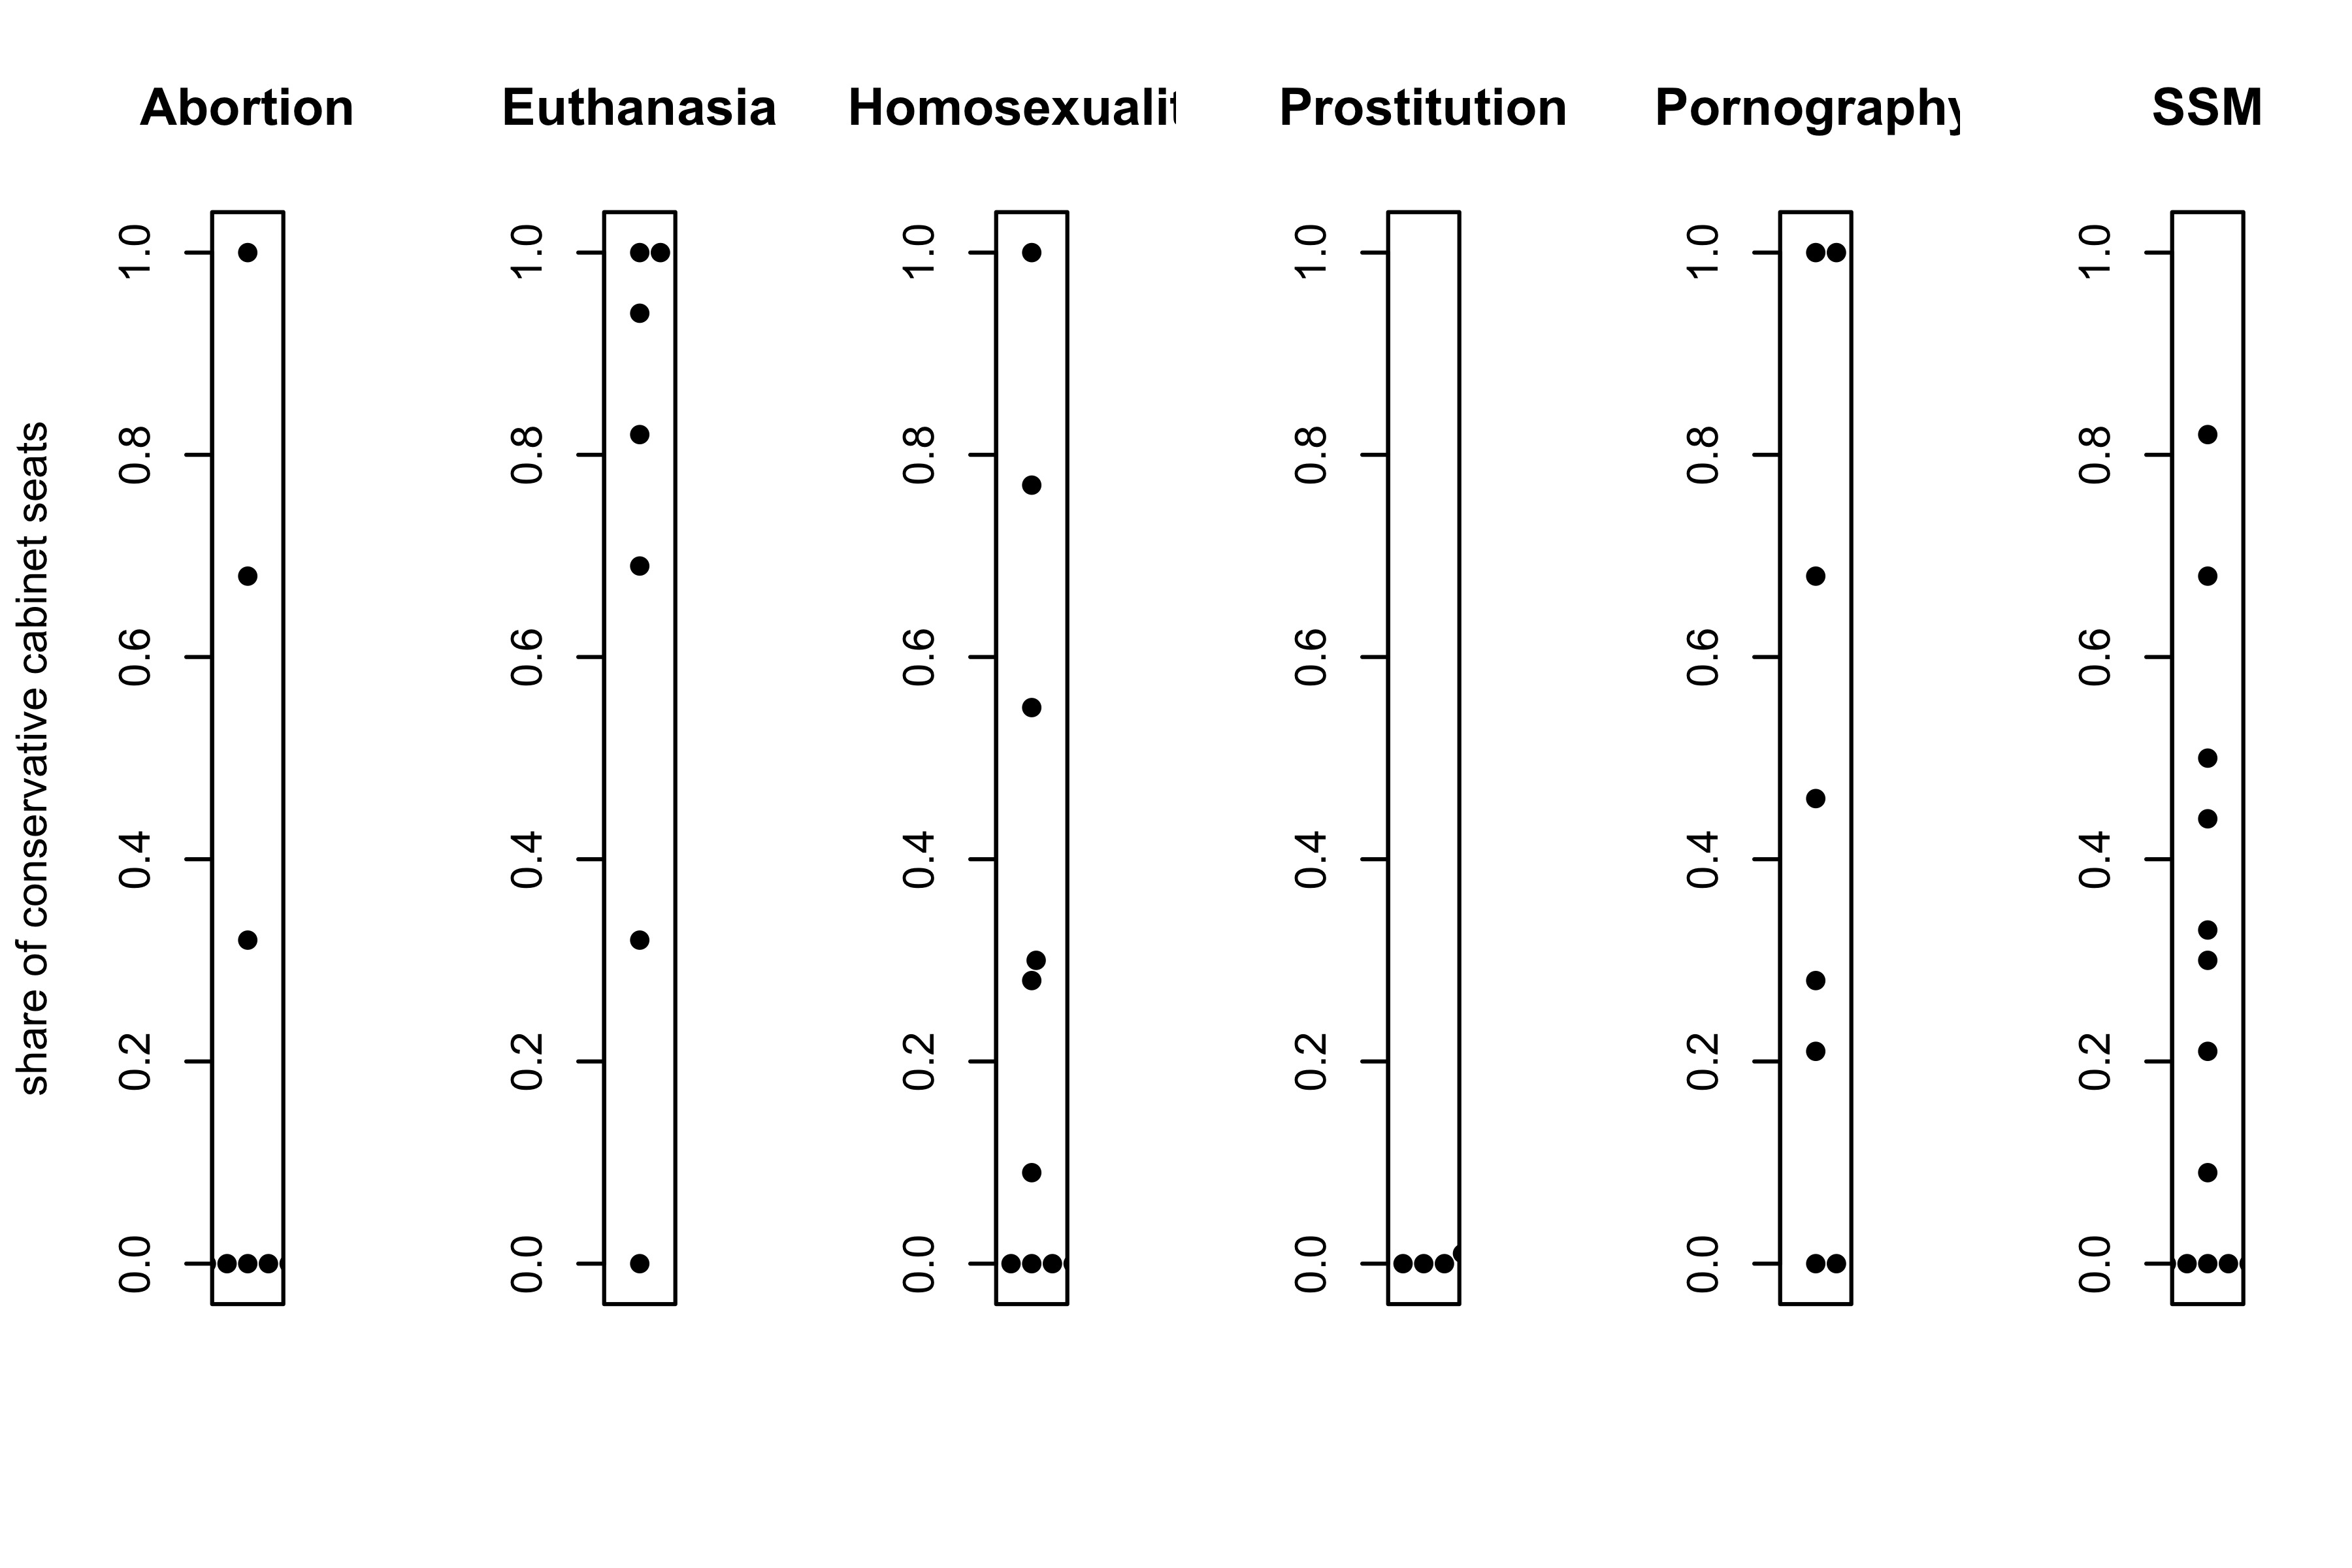
**

**Figure A8: Strength of Conservative Parties for Restrictive Reforms (Secular World)**

**
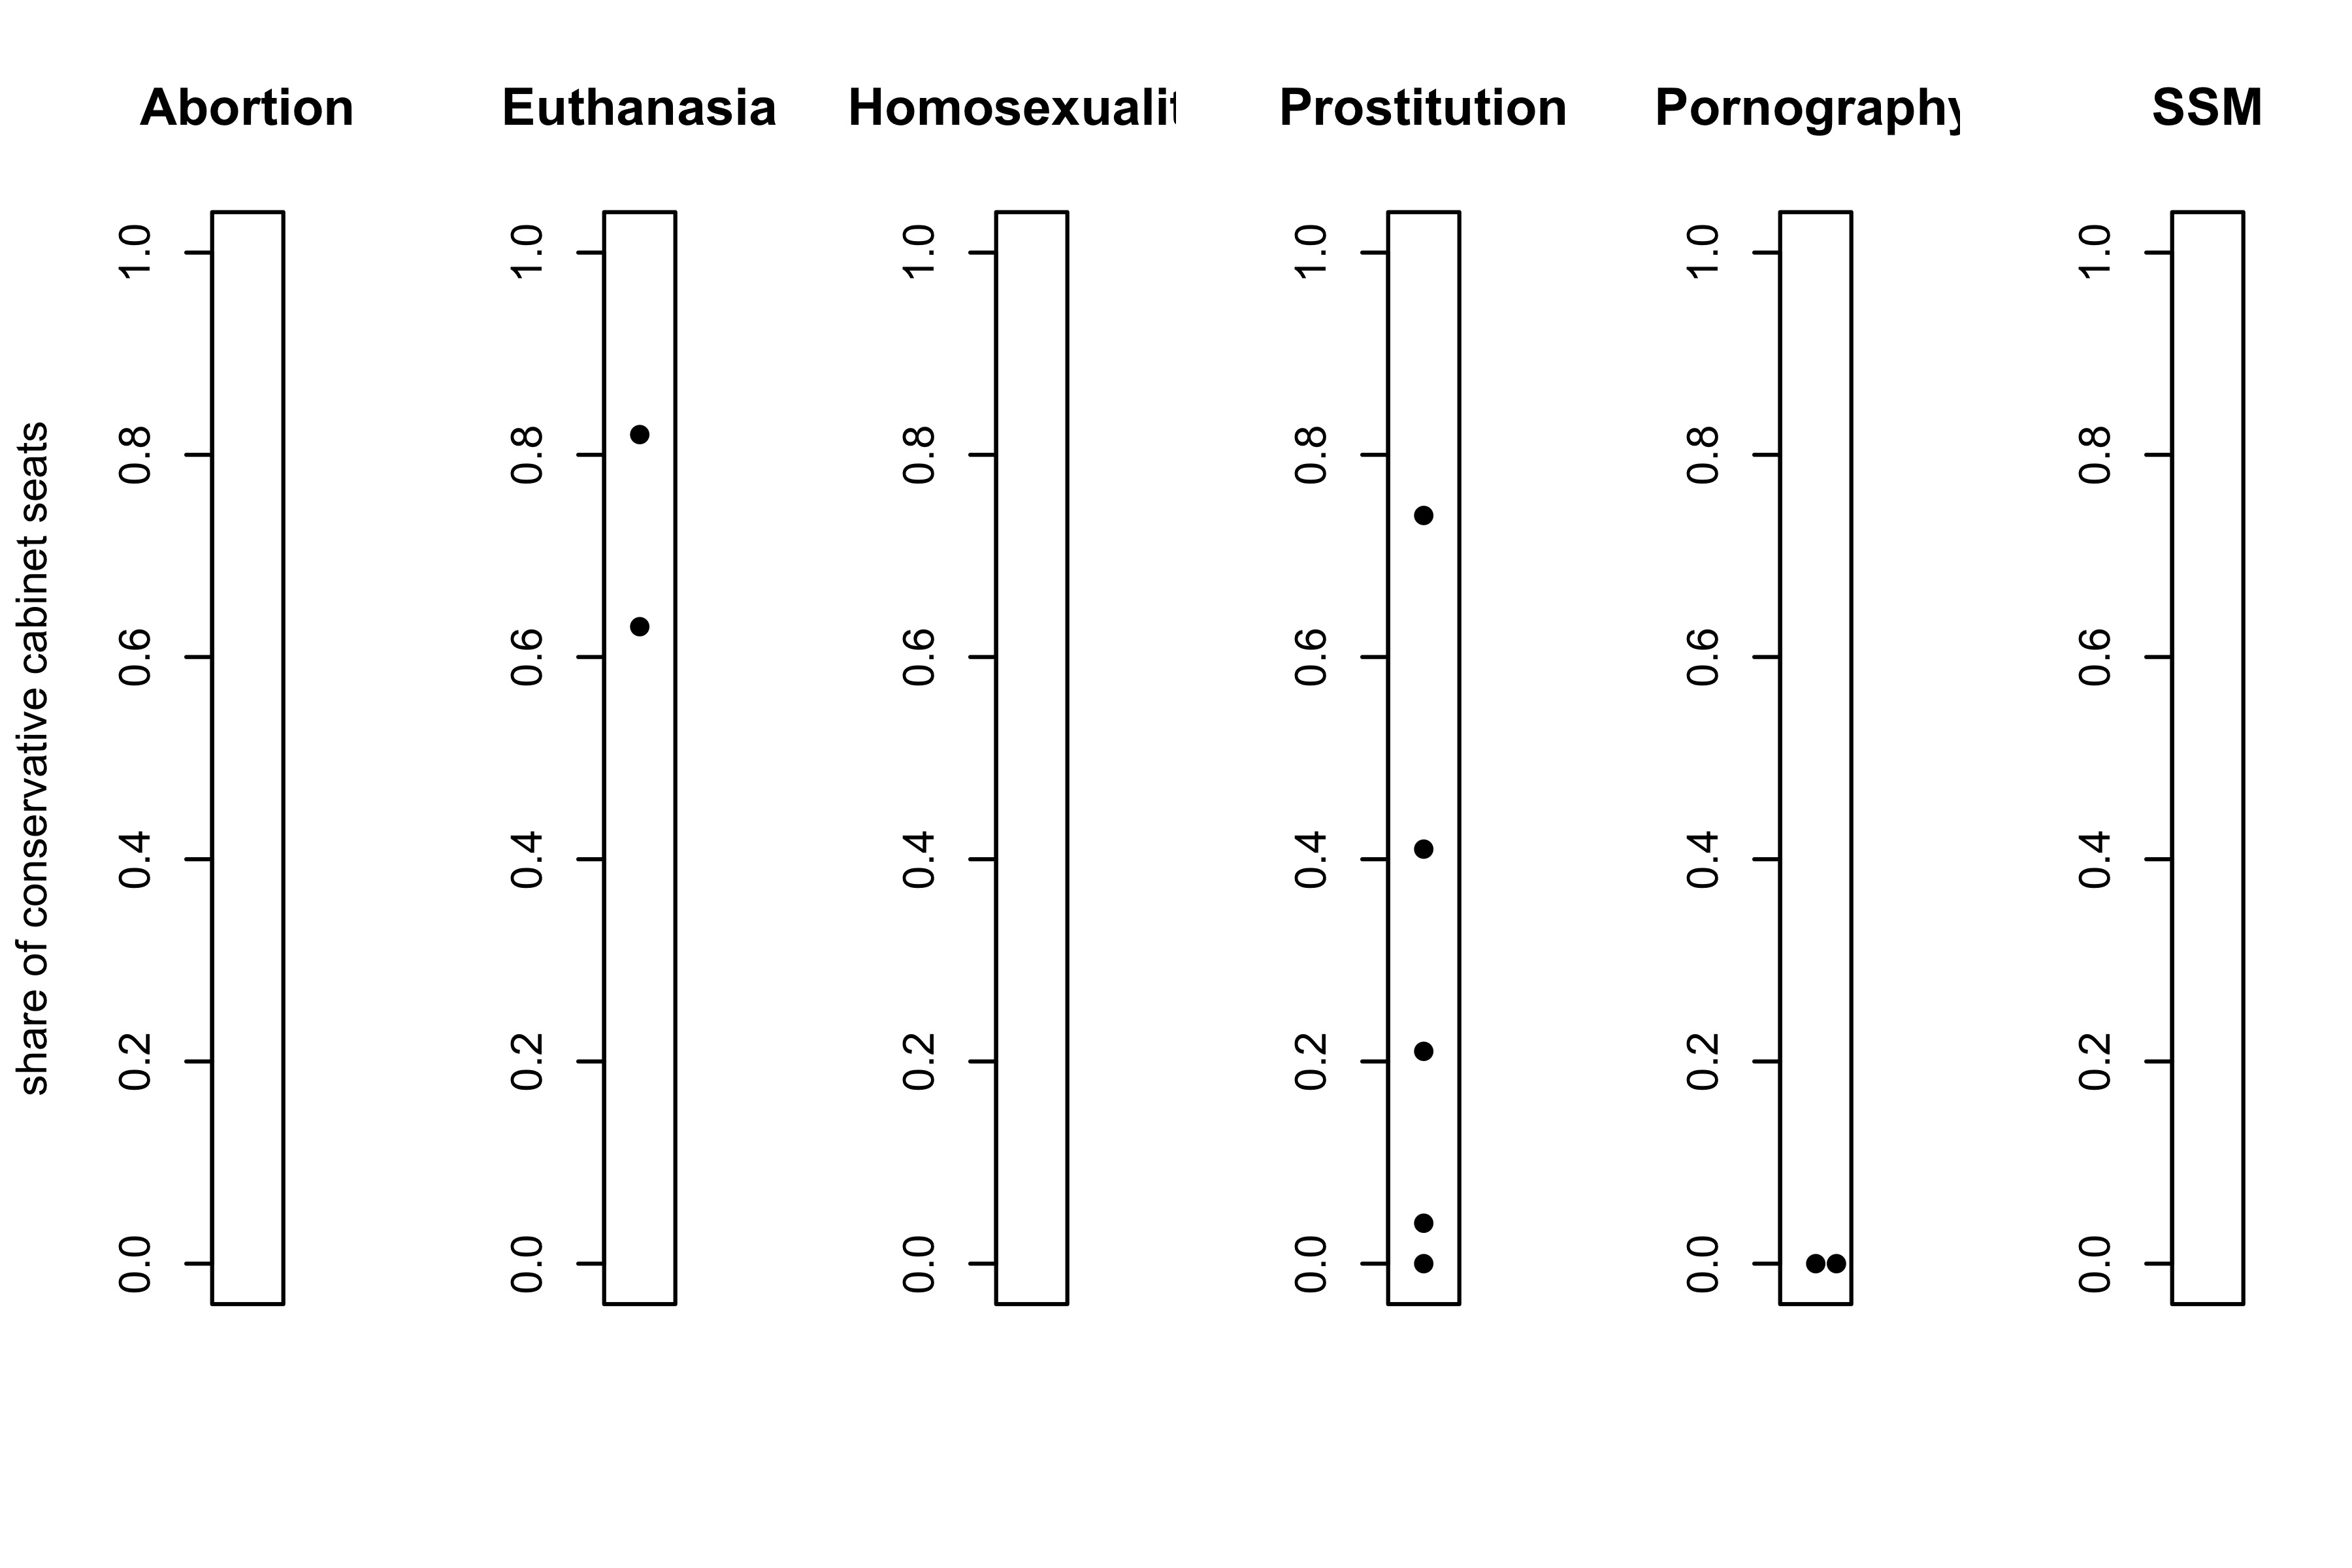
**

**Figure A9: without Abortion**

**
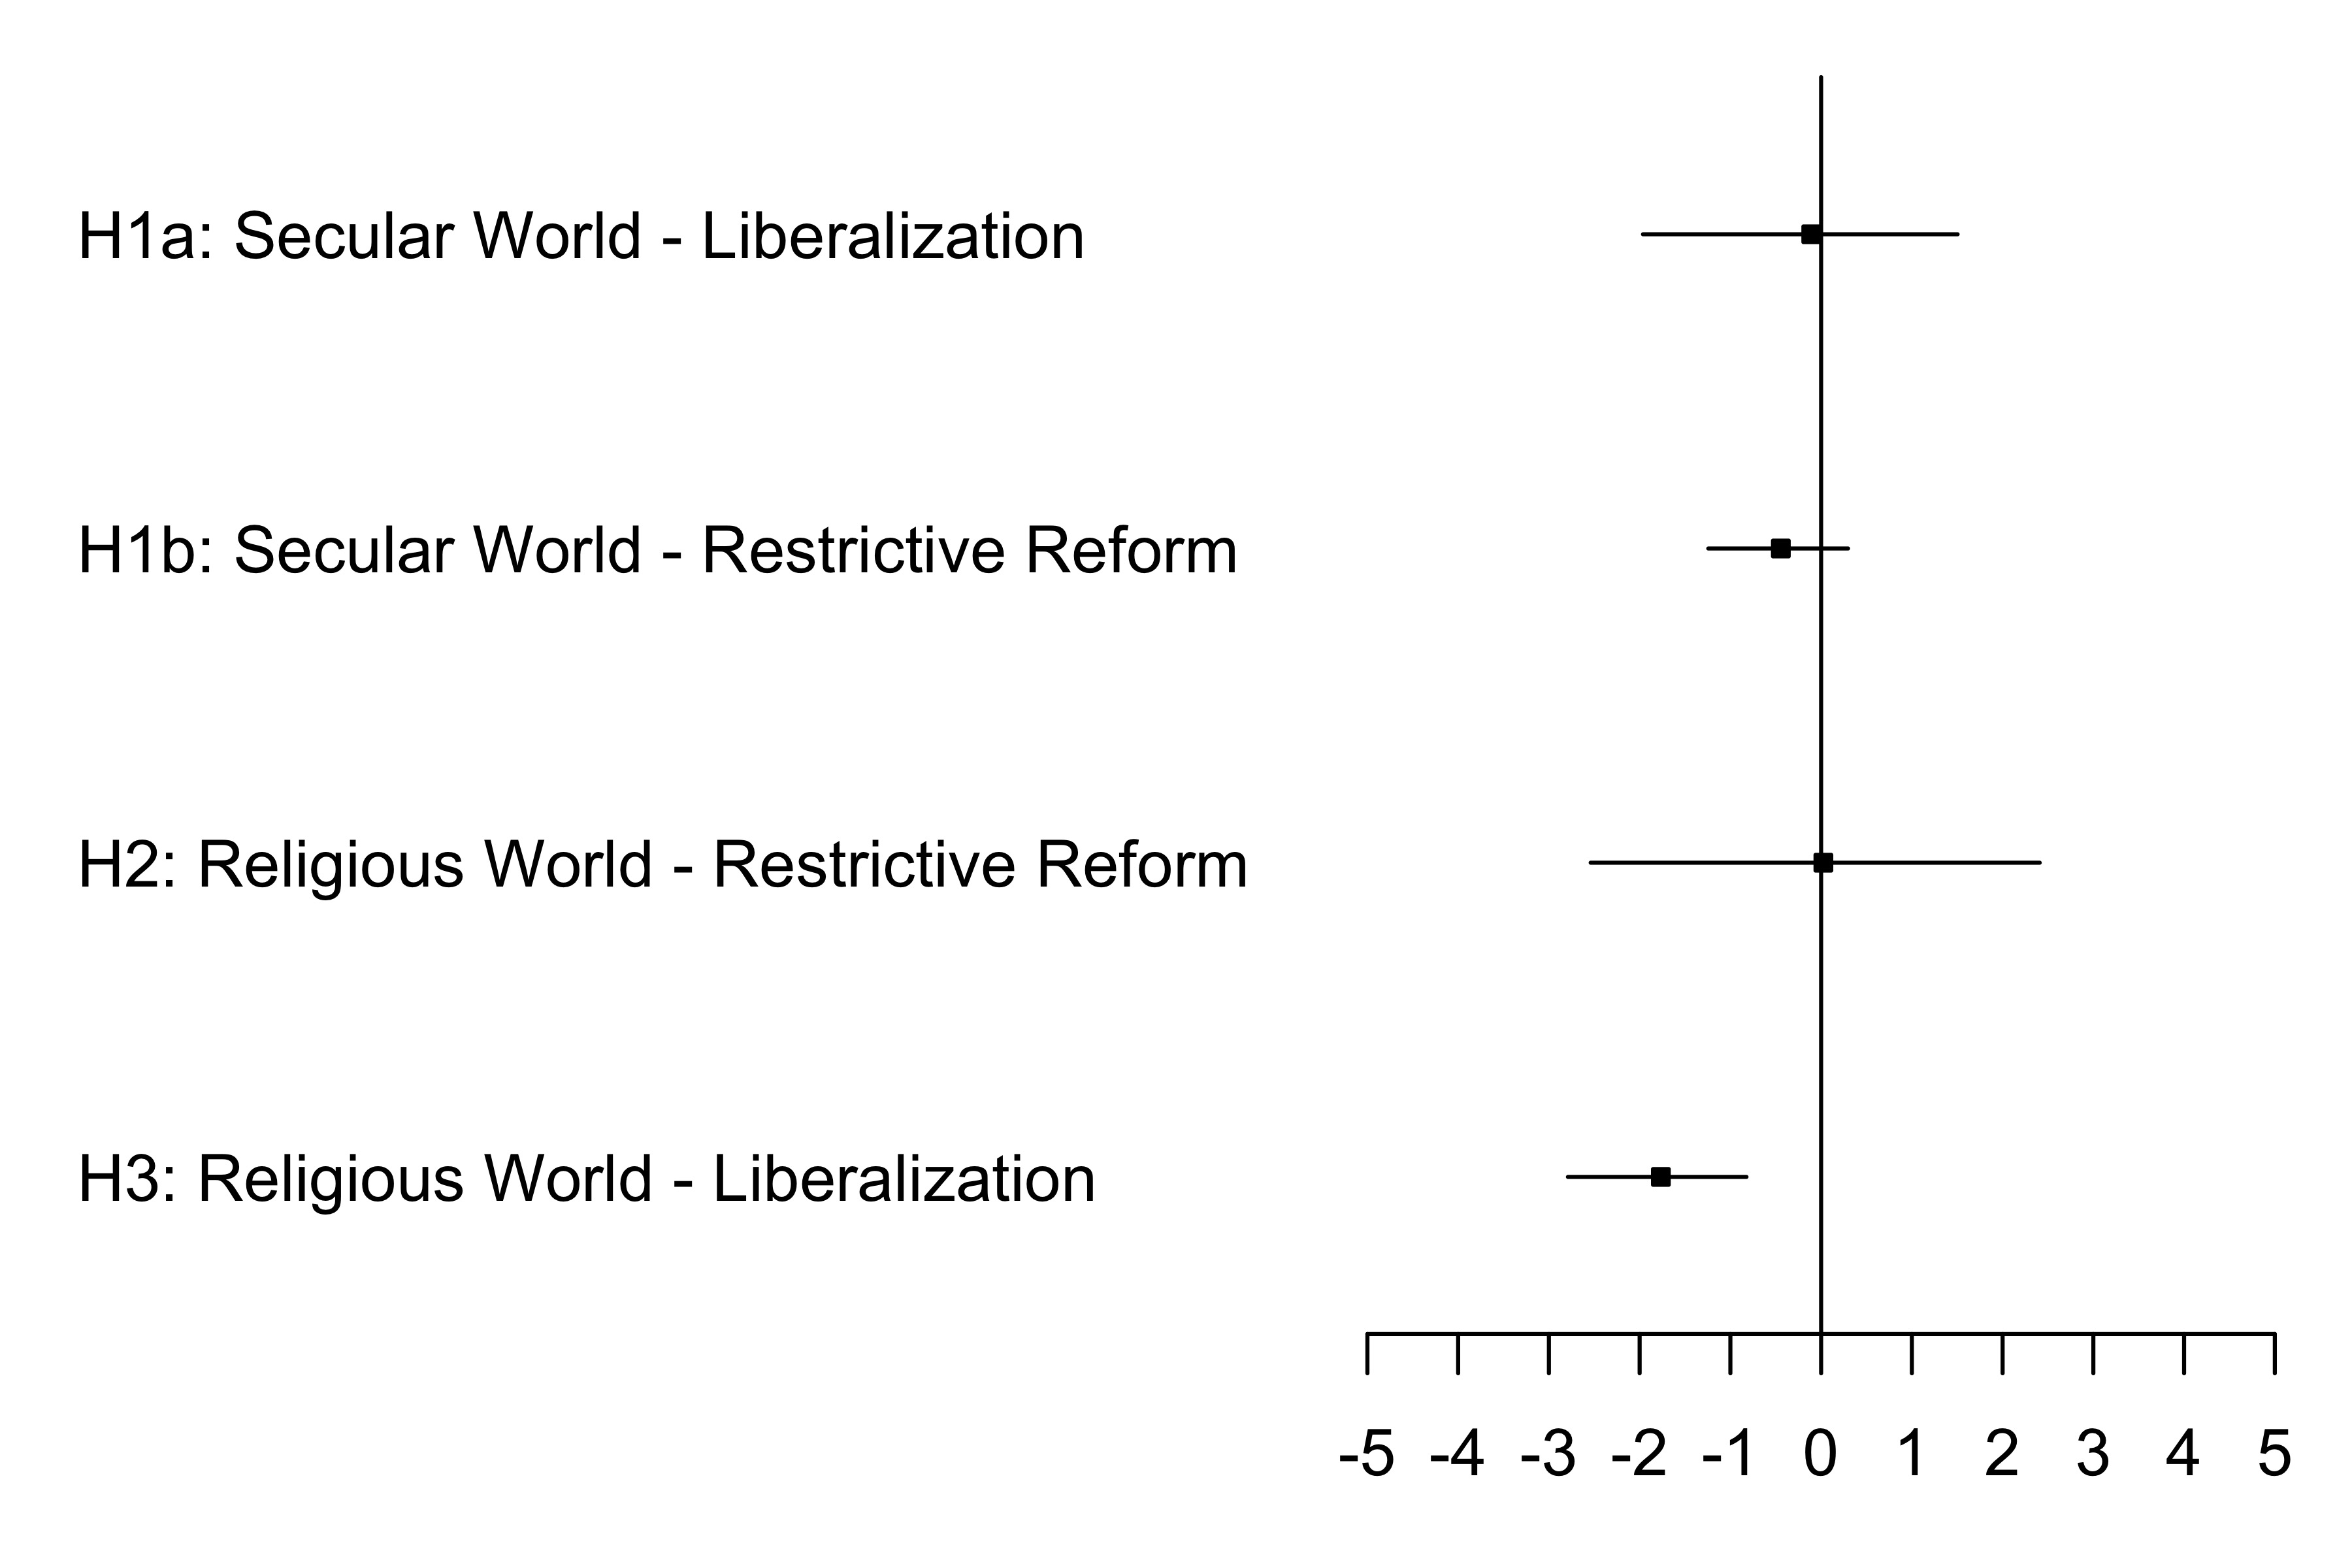
**

**Figure A10: without Euthanasia**

**
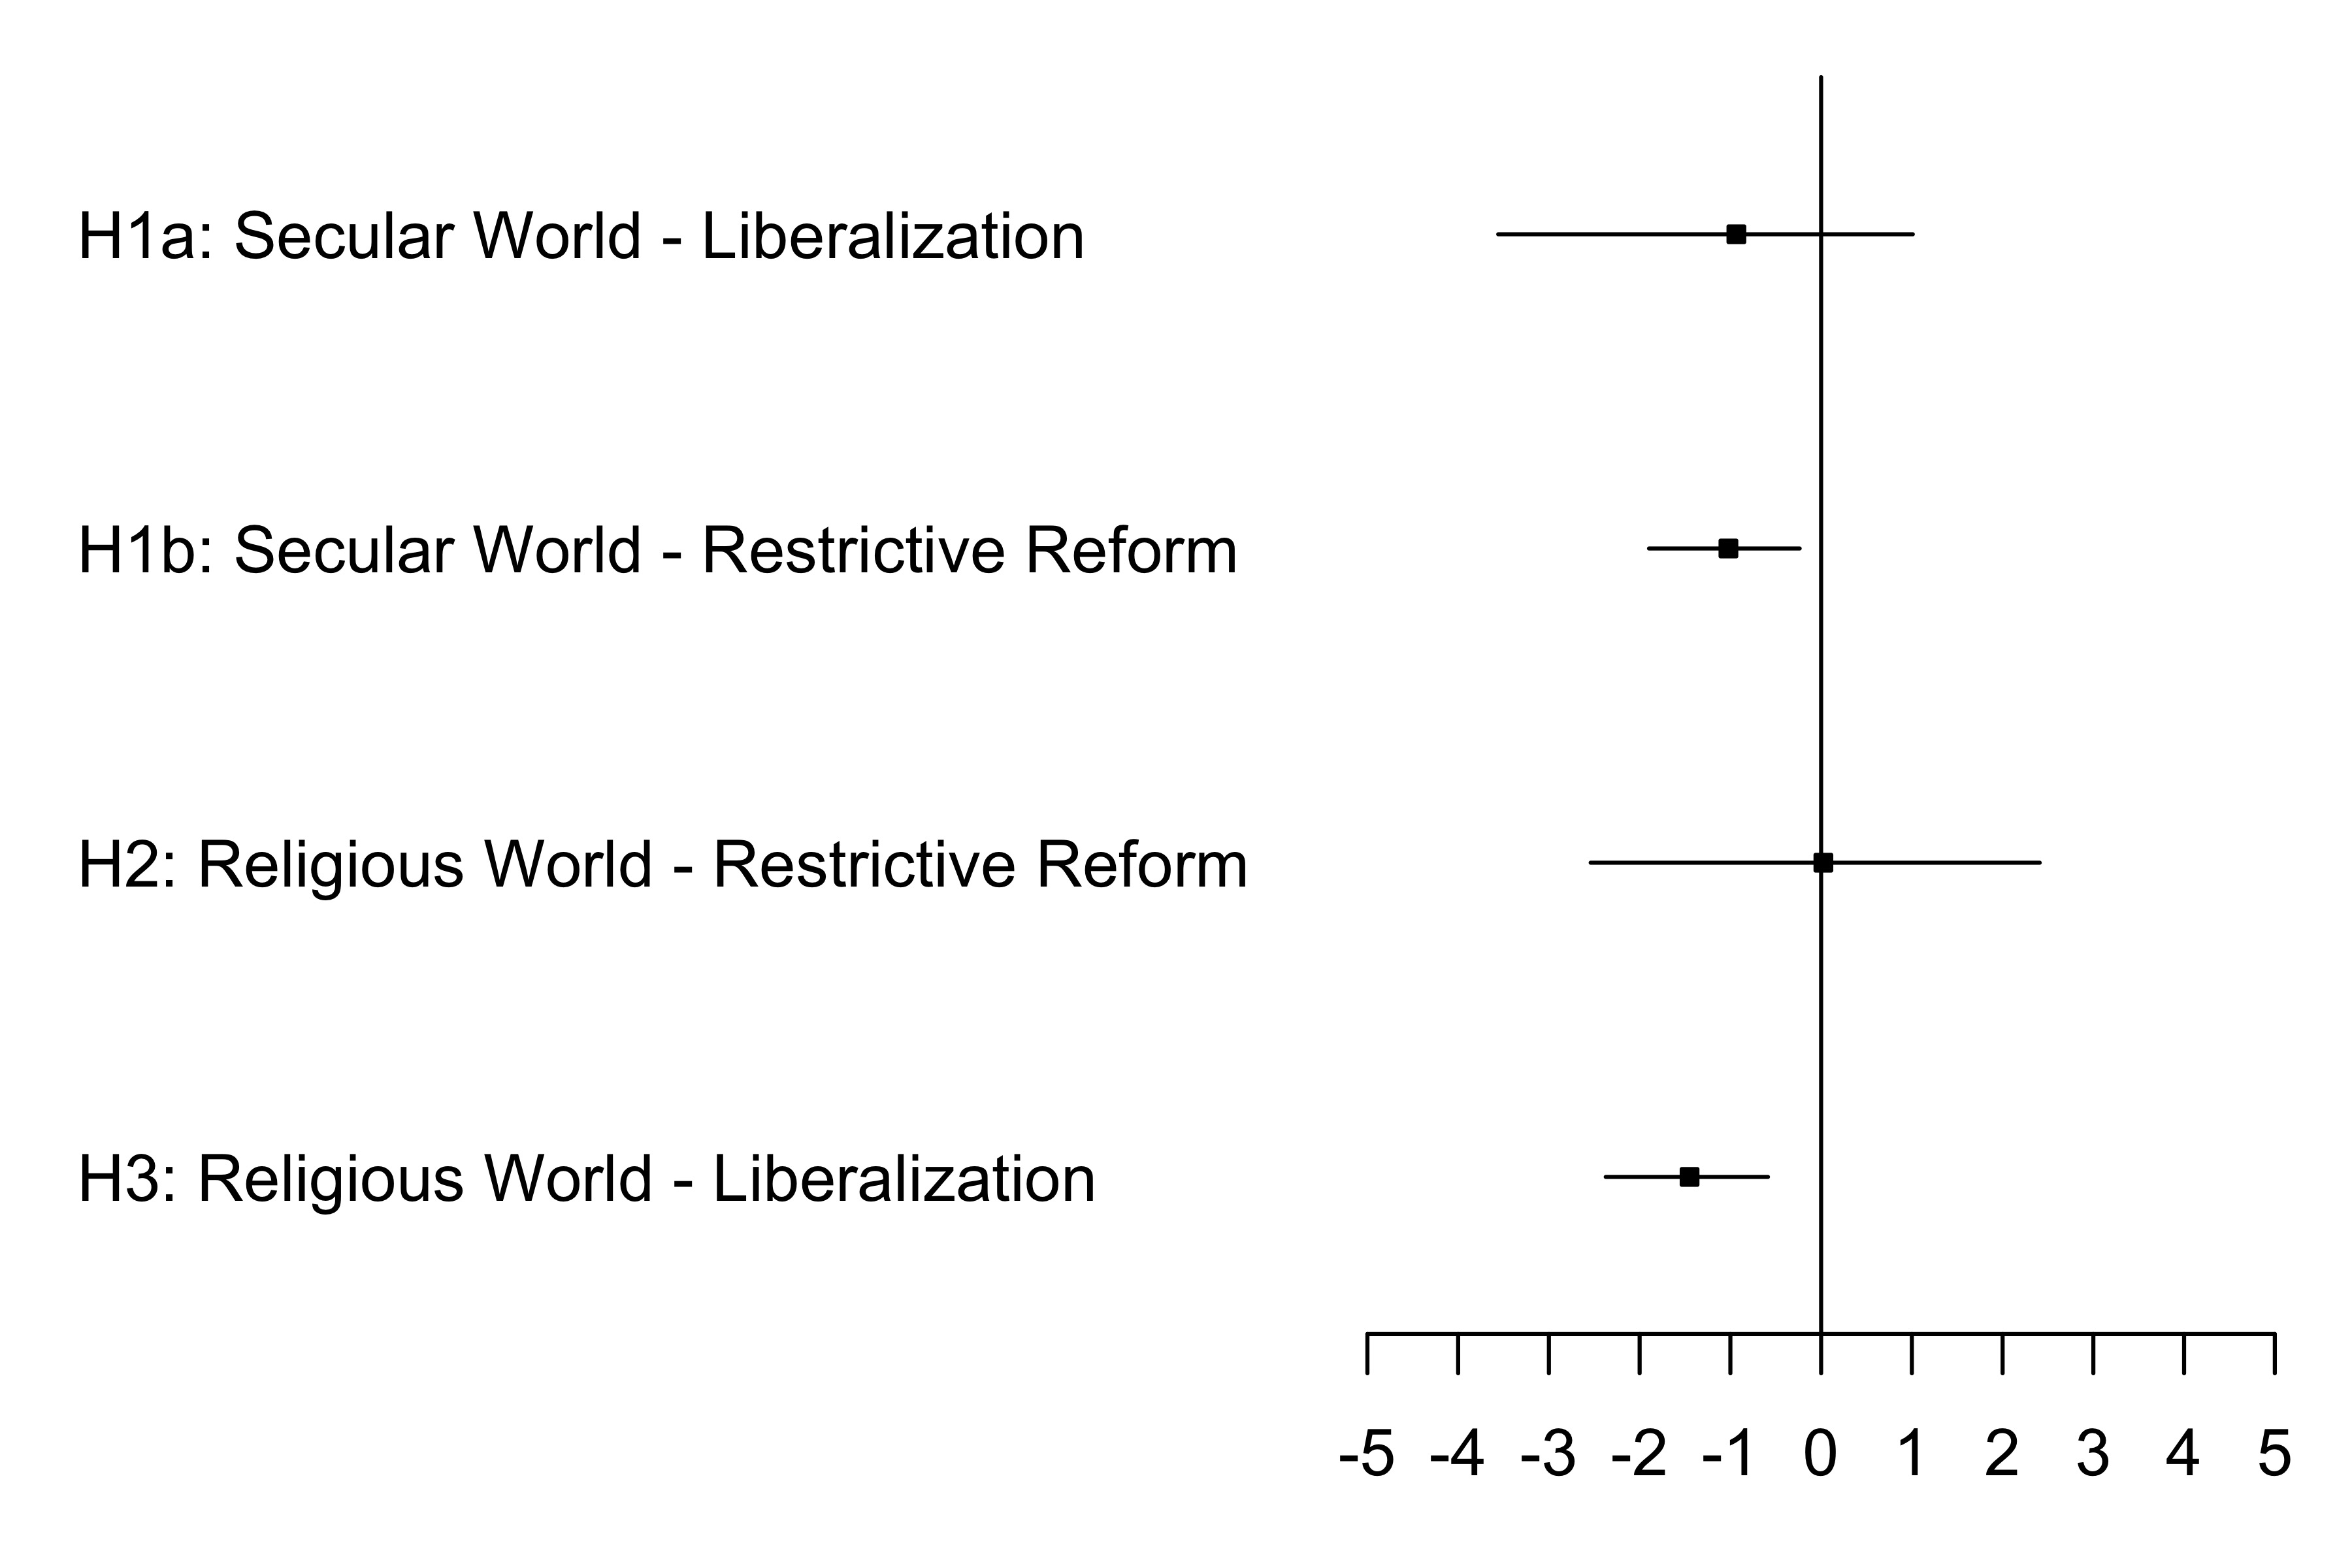
**

**Figure A11: without Homosexuality**

**
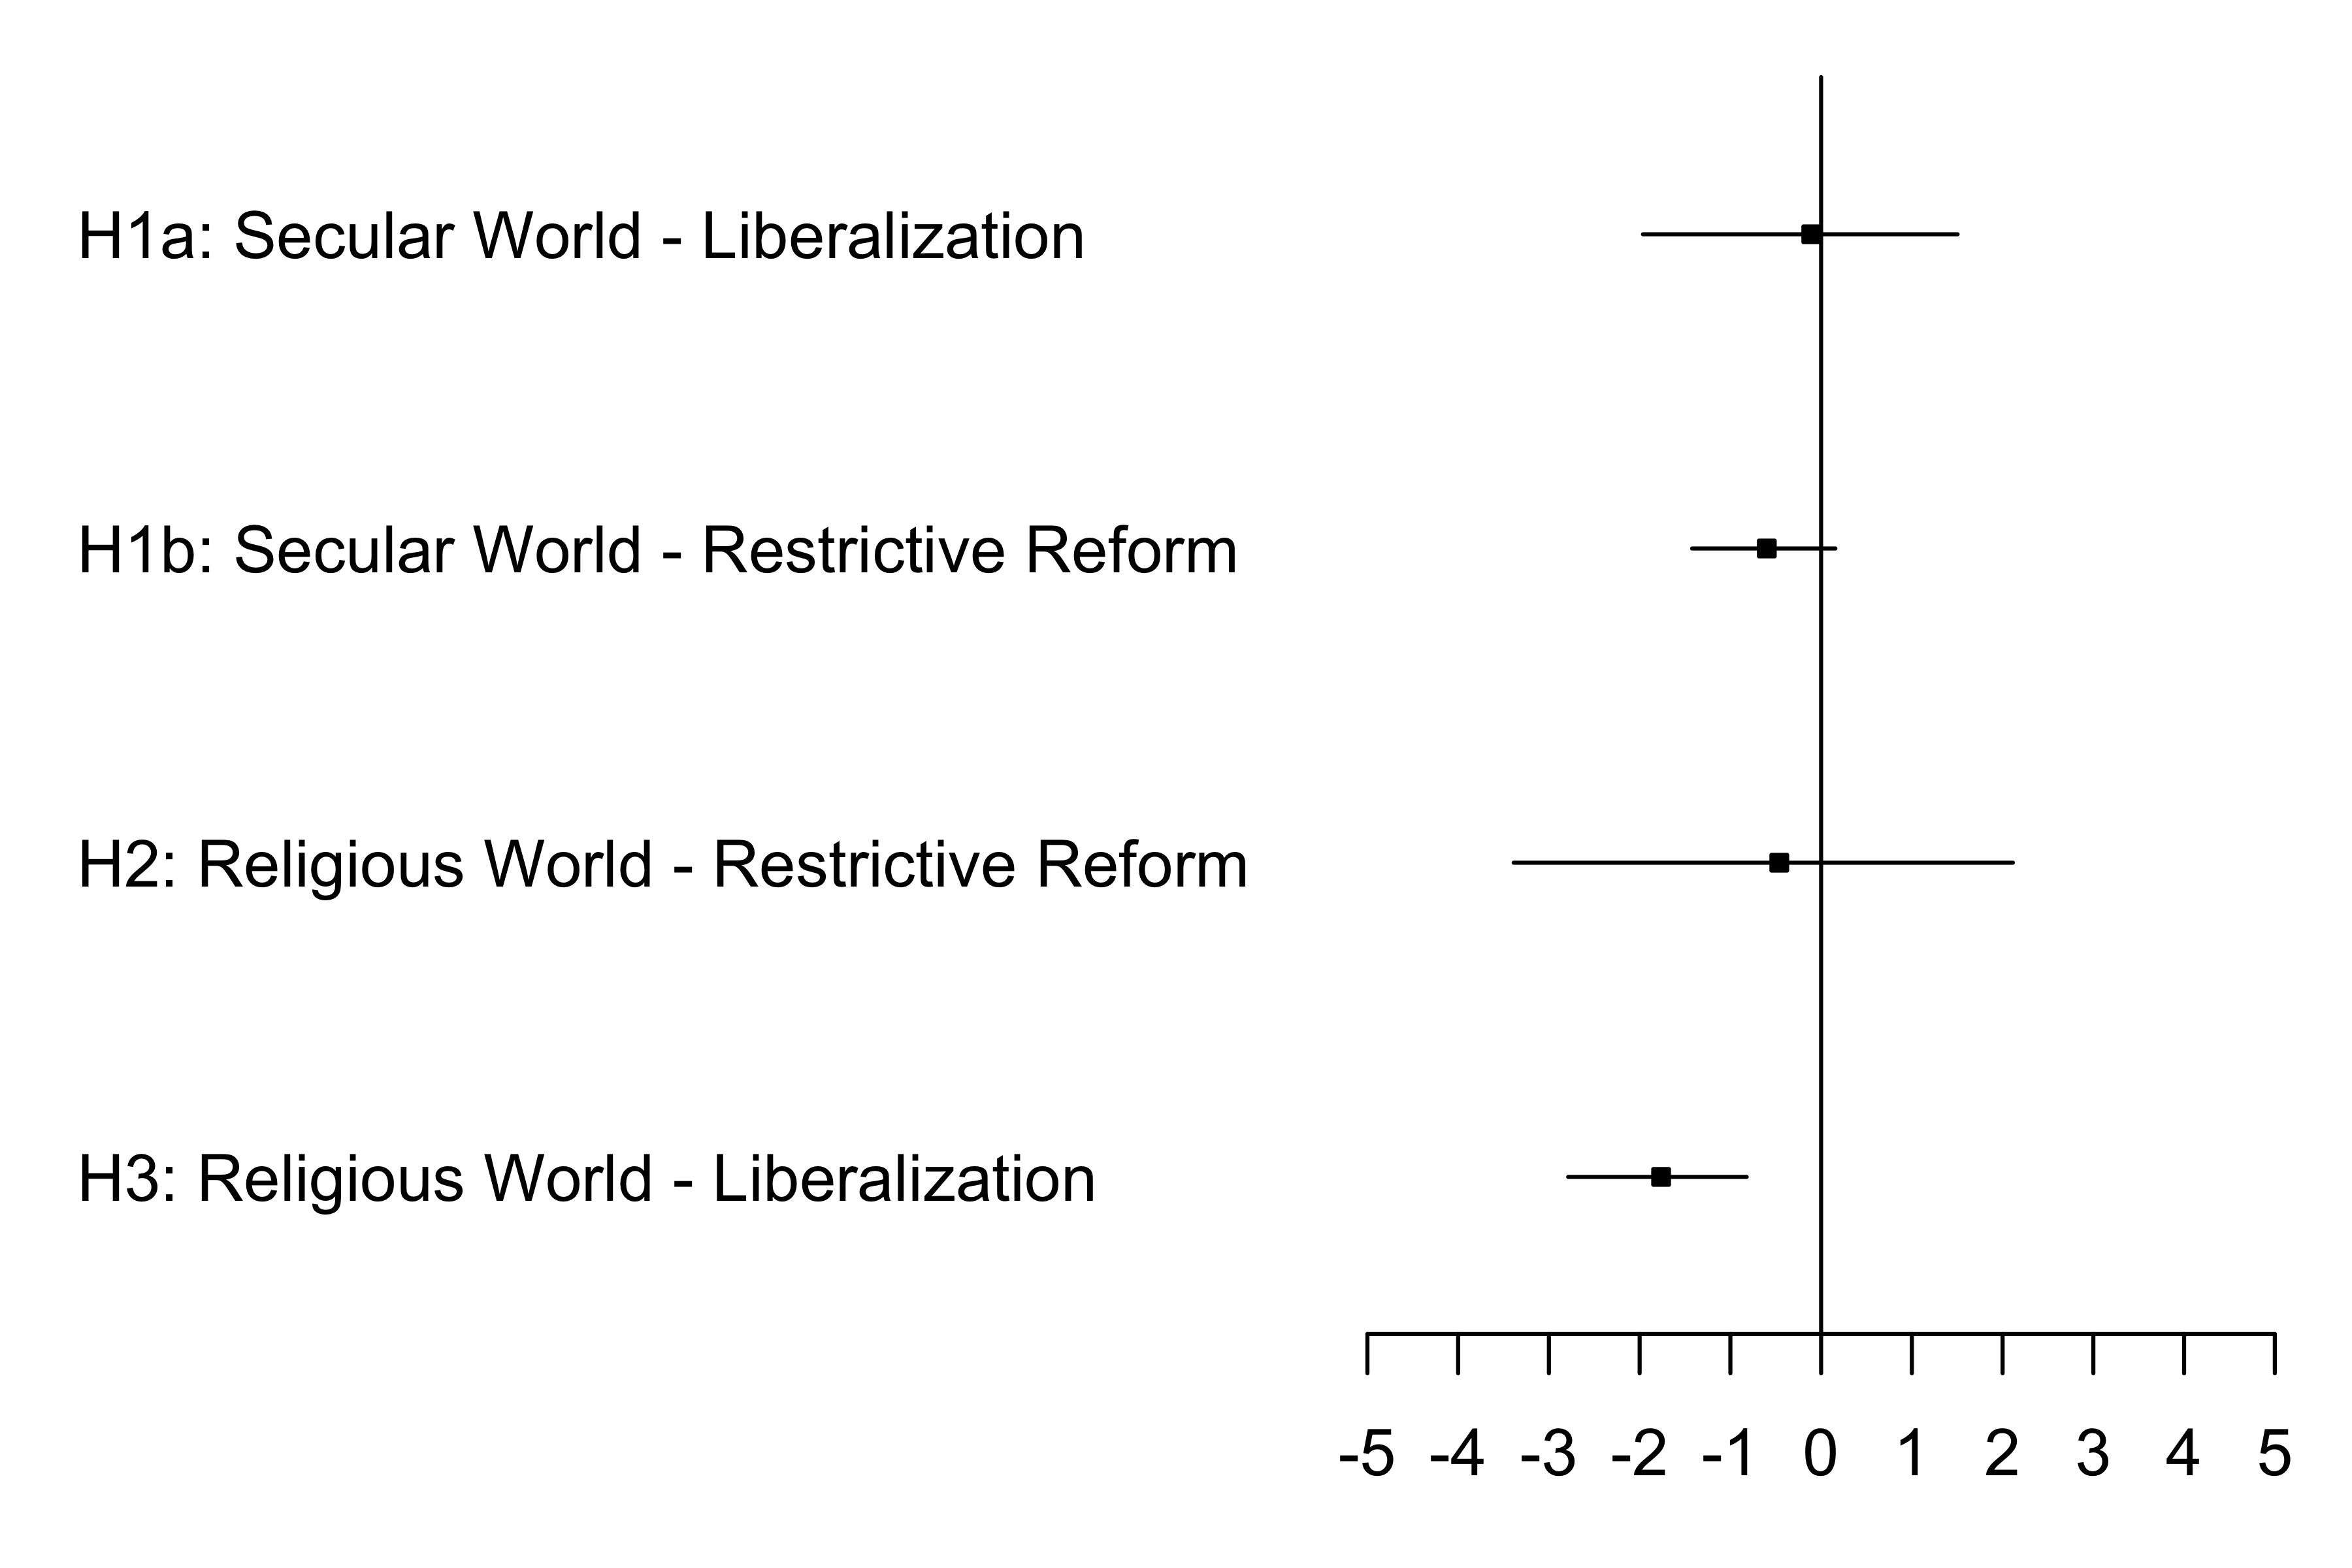
**

**Figure A12: without Pornography**

**
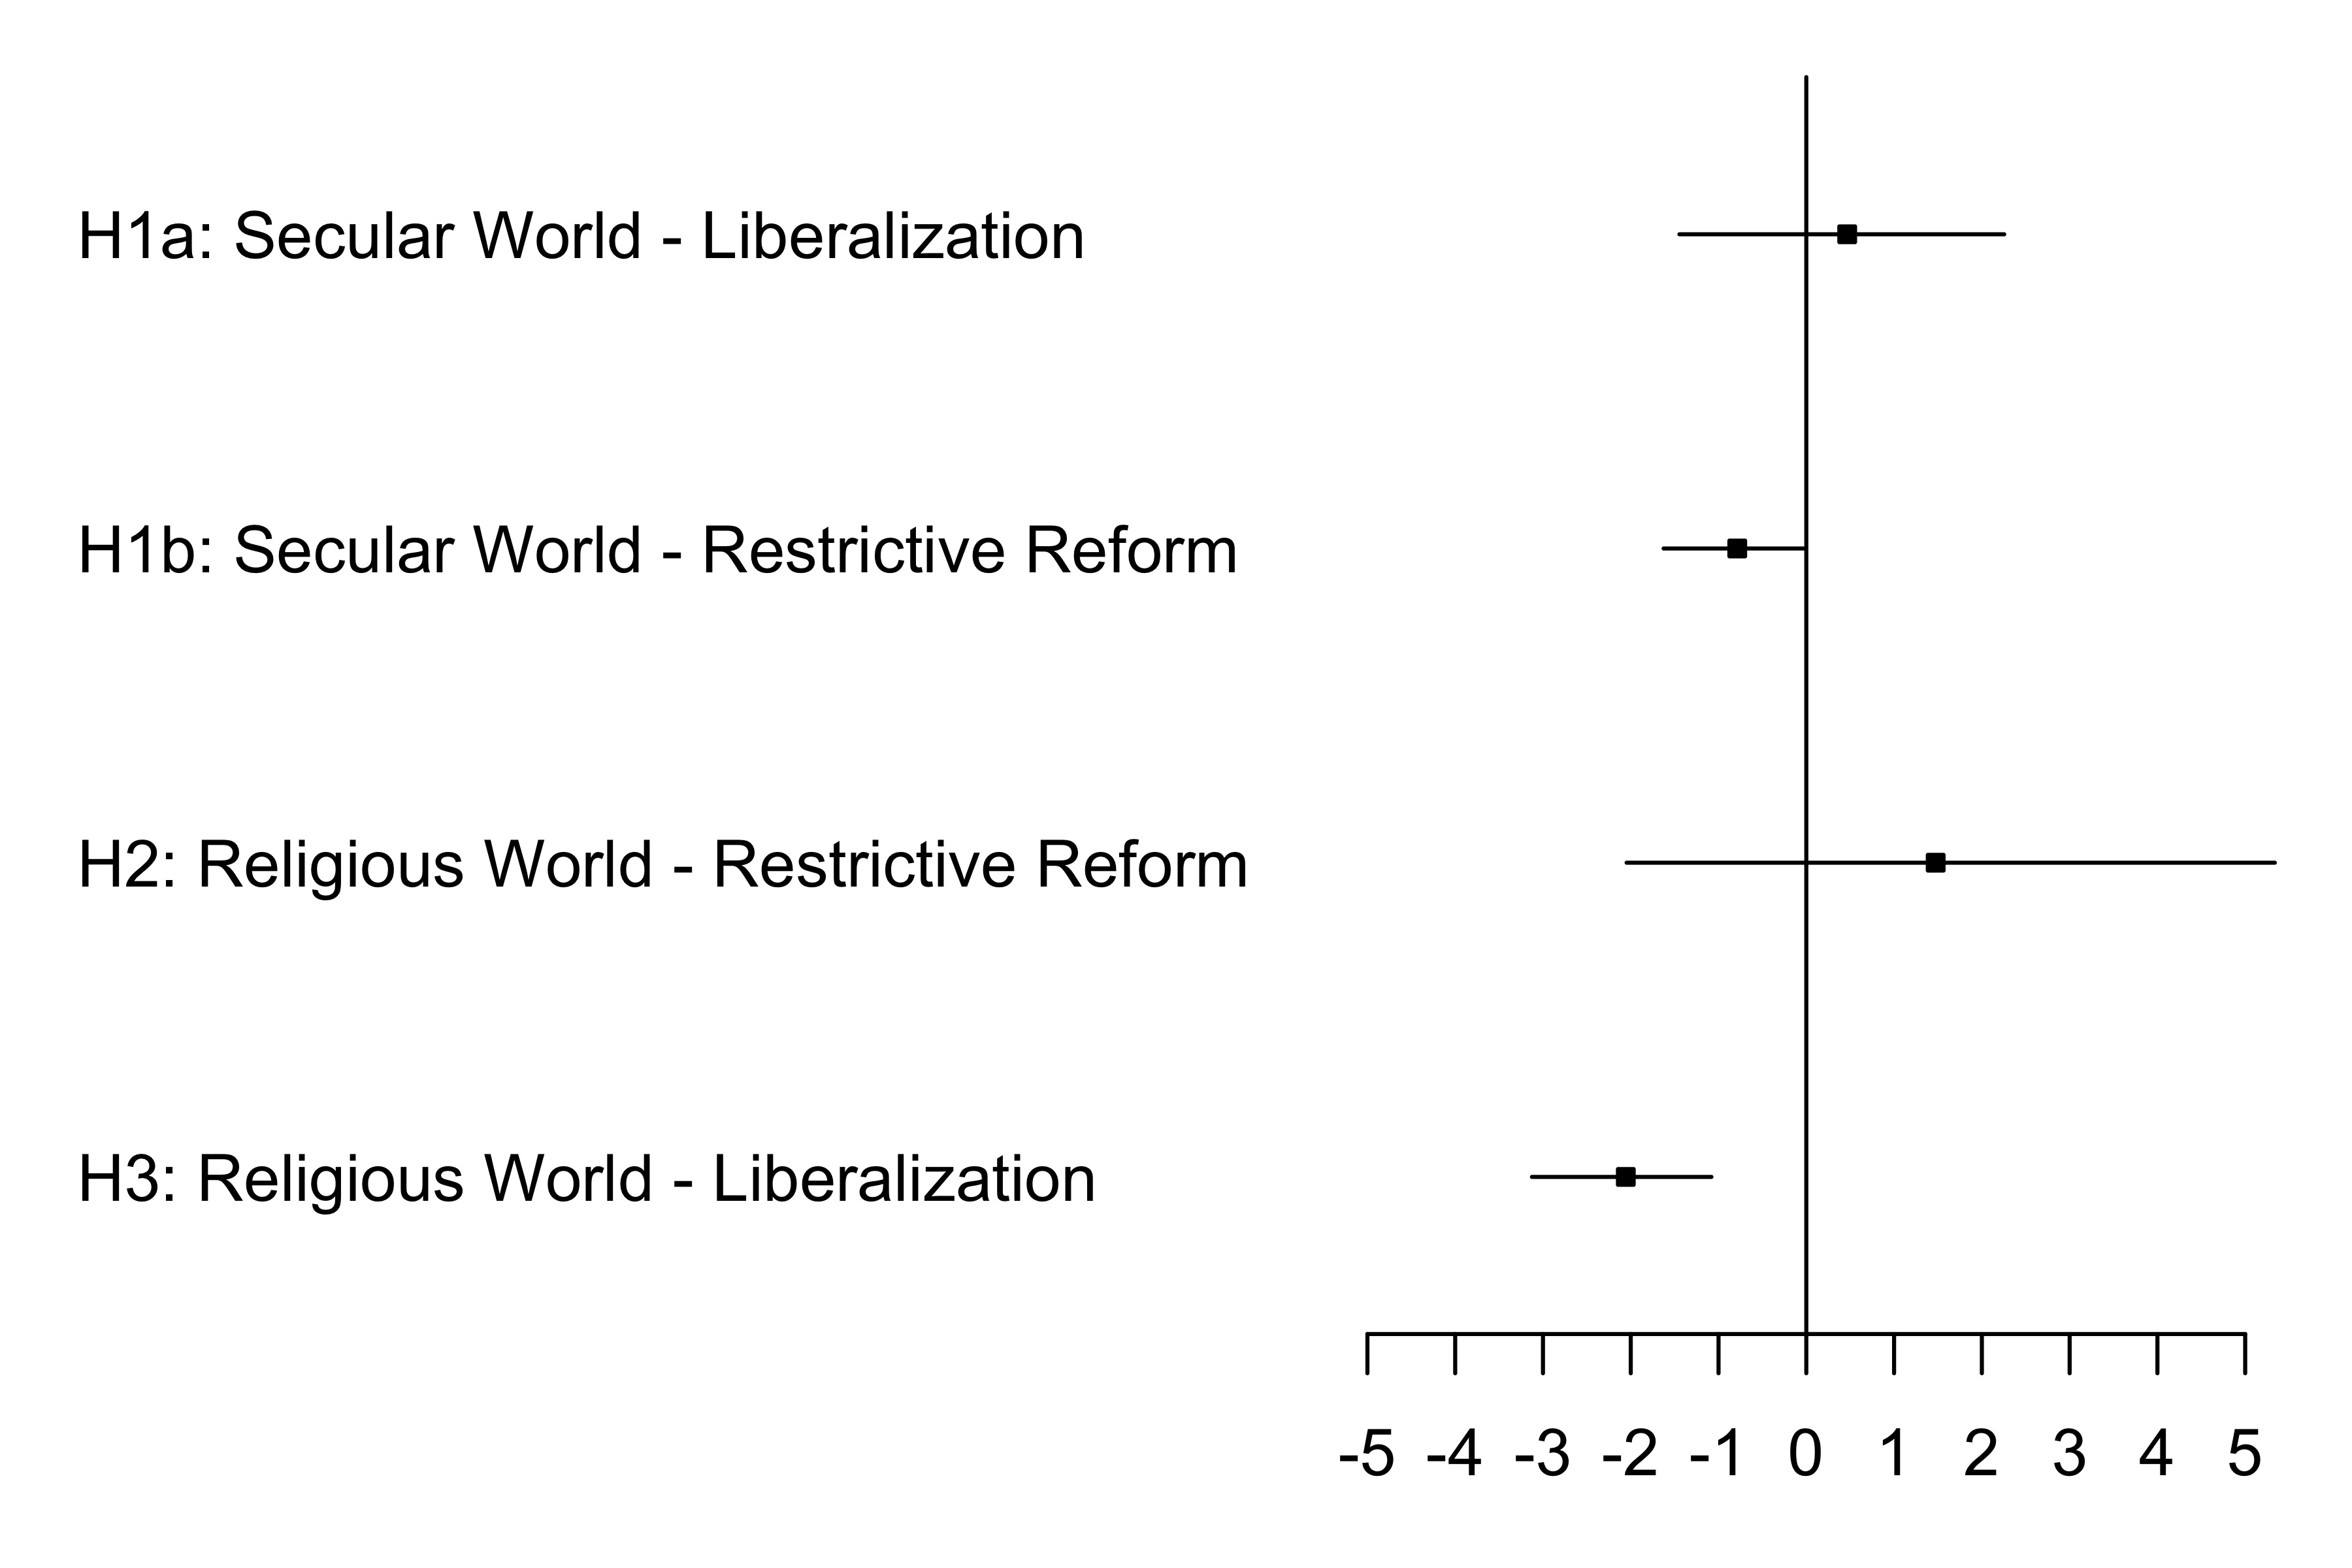
**

**Figure A13: without Prostitution**

**
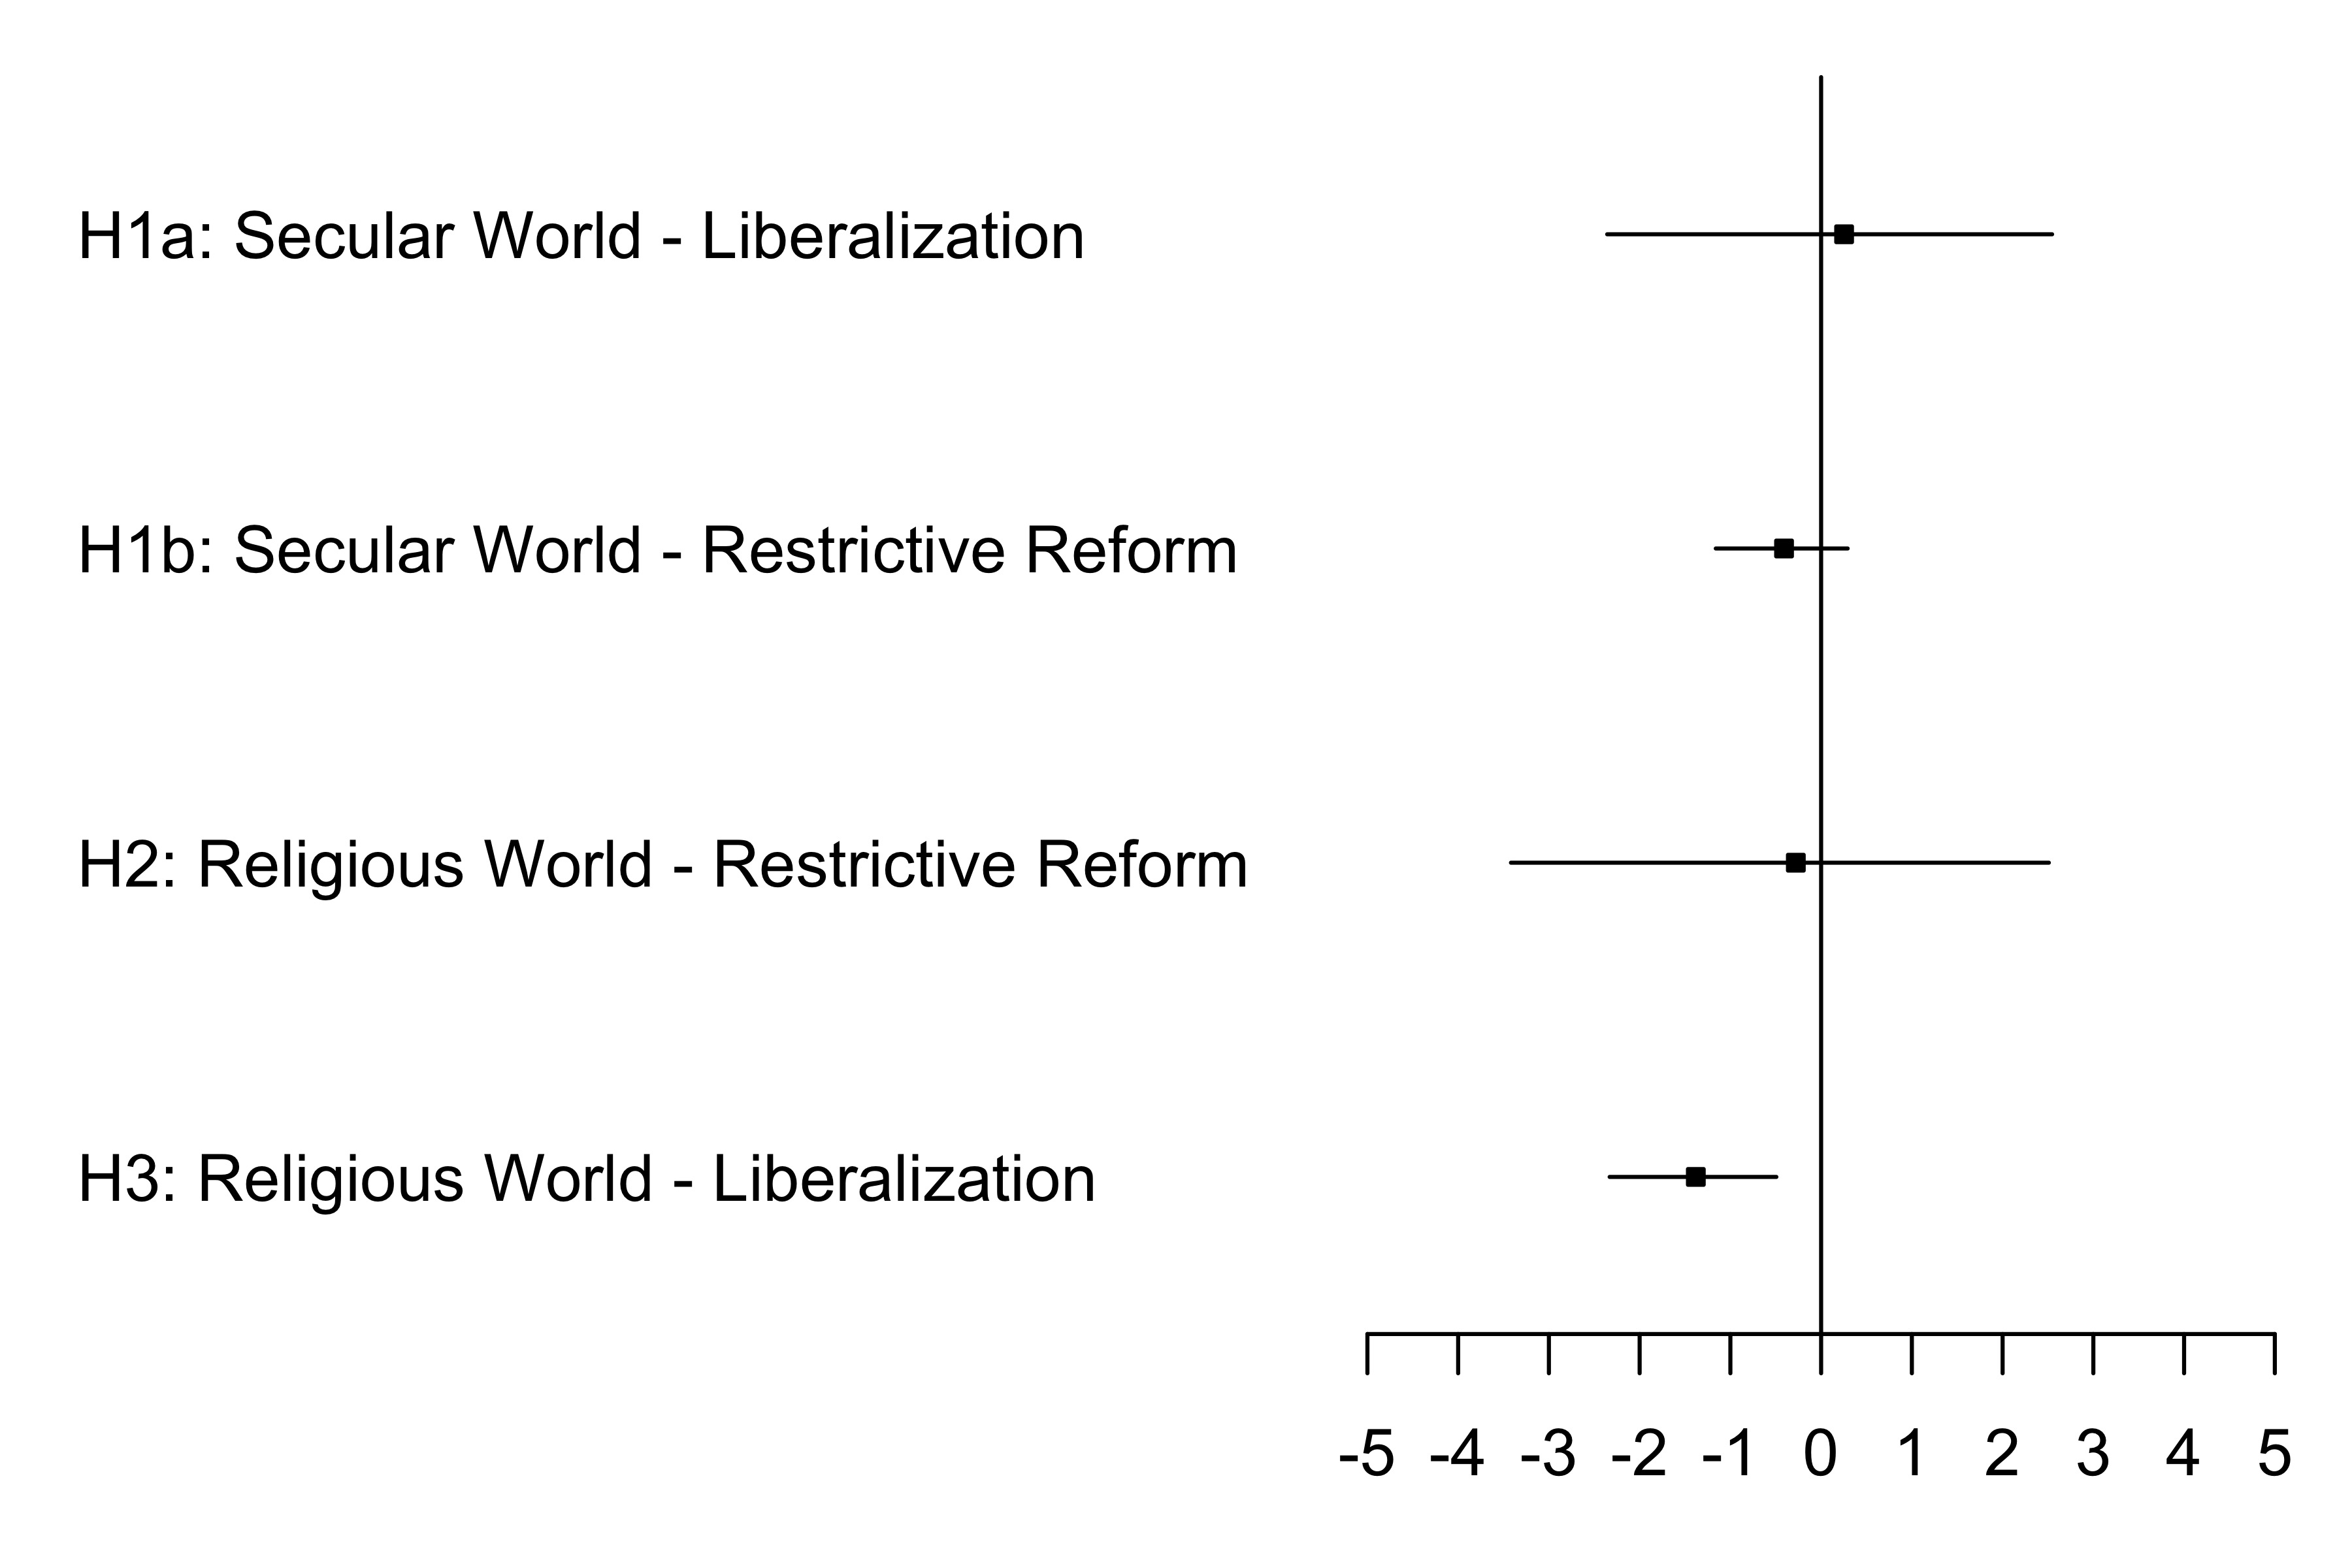
**

**Figure A14: without Same-Sex Marriage**

**
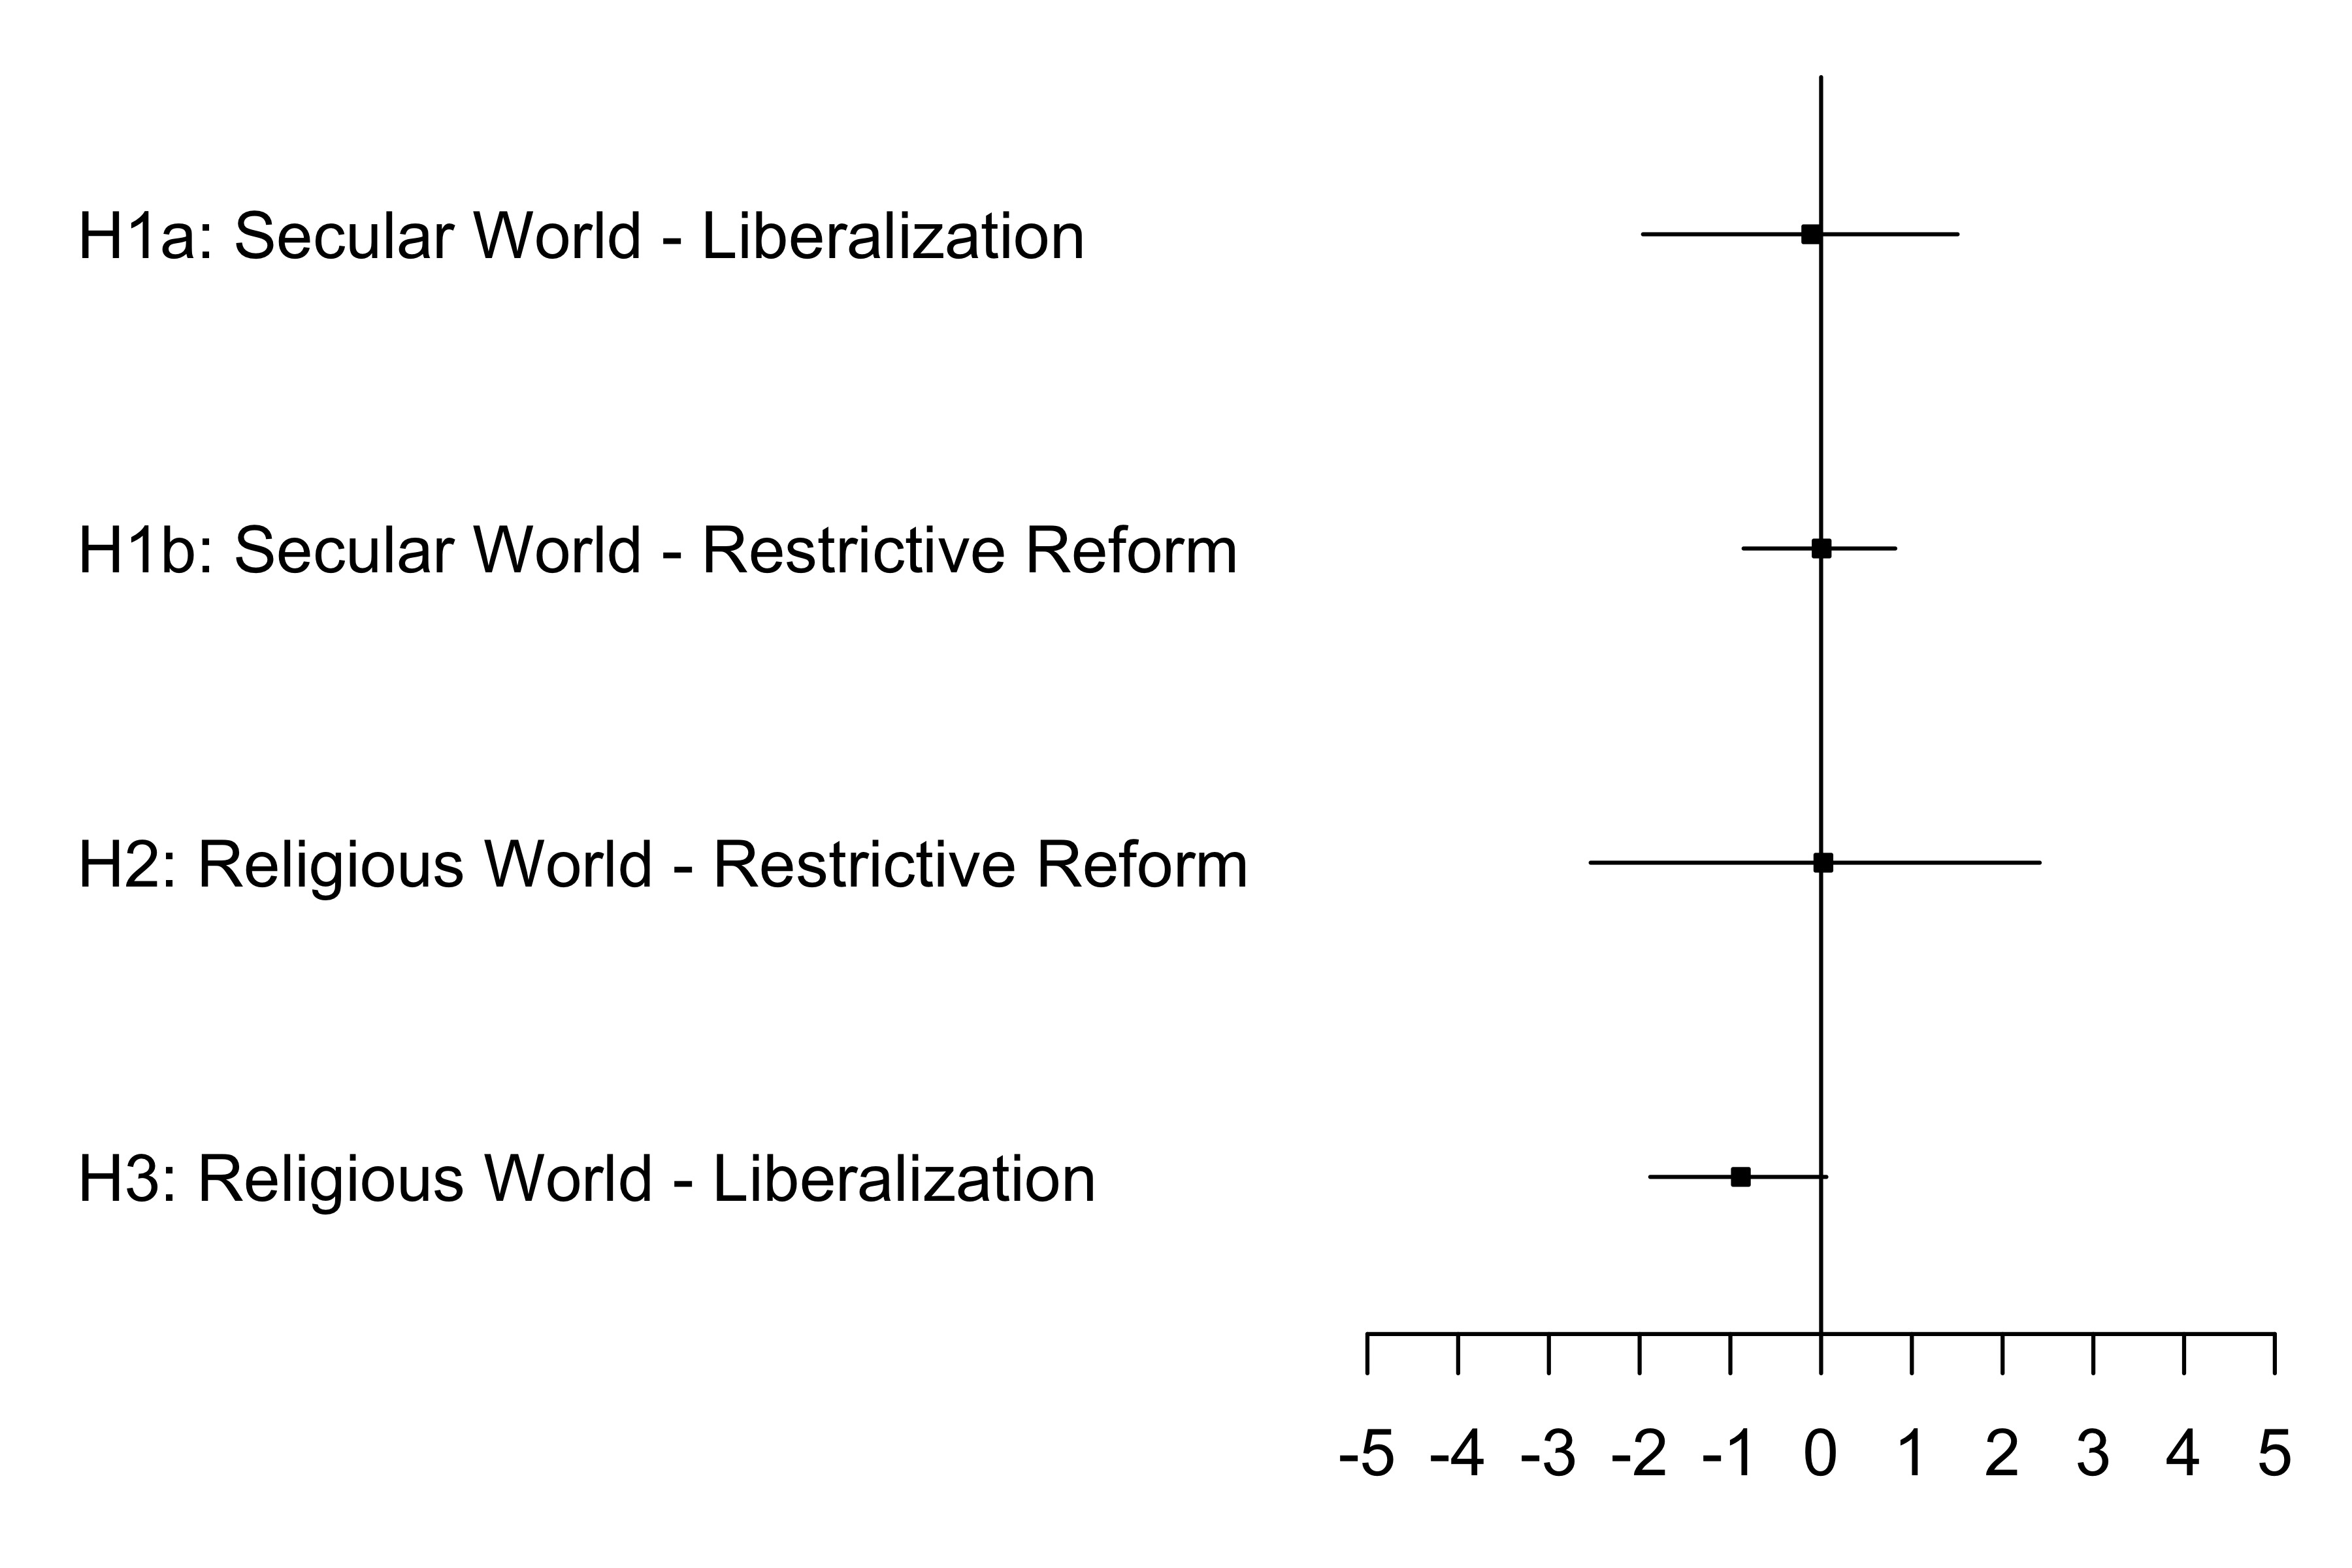
**

Dropping the area of same-sex marriage from the analysis still suggests strong Christian Democratic parties in the religious world effectively block liberalizations. However, figure A16 highlights that the 95% confidence interval slightly overlaps with a zero effect. The table A7 below provides the information underlying this last line in figure A16 and shows that while dropping the issue of same-sex marriage affects the results to some extent, the coefficient for “strength of conservative parties” is still negative and still significance at the 10% level. The results are thus slightly sensitive to the inclusion of same-sex marriage. Yet, the general tendency of the results remains unchanged even for excluding this – arguably – most prominent area of morality policy.

**Table A7: Impact of Conservative Parties in the Religious World on Liberalizations (without Same-Sex Marriage; H3); basis for last line in figure A16:**

**Additional Case Study Information: Assisted Suicide**

The political debate about prohibiting commercial or organized services related to assisted suicide goes back to 2007. When Roger Kusch – as former member of the Christian Democrats and Secretary of Justice in Hamburg – founded an organization to support assisted dying in Germany. In exchange for a financial contribution, the organization helped people with the wish to die in realizing this wish. Kusch and his organization sought and found the public spotlight; particularly with the help of press conferences that would include the presentation of a lethal injection apparatus they intended to offer to people.[[1]](#footnote-1) When the organization advertised its services on its website by August 2008, this was quickly prohibited by police authorities. Nevertheless, three state governments (*Landesregierungen*) led by Christian Democratic prime ministers presented a legislative proposal to Germany’s second chamber (*Bundesrat*) that would define such services as a criminal offense. While their proposal was blocked by the other state governments in the *Bundesrat*, the proposal did in fact represent the first attempt to introduce a §217 on euthanasia to the German penal code.[[2]](#footnote-2) Its blockage, however, made the proposal disappear from the agenda for over a year. Hamburg’s Administrative Court had confirmed the legality of police actions against Kusch and his organization and consequently there seemed to be little need for further political action. In fact, the proposal did not make it into the Christian Democrats’ election campaign manifesto for the federal election in the fall of 2009[[3]](#footnote-3). While they emphasized their opposition to active euthanasia, prohibiting organizations that facilitated assisted-dying was not mentioned. The issue only re-appeared on the agenda after the election, when Kusch announced the foundation of a new organization in October 2009. This organization would not charge people for assisted-dying services but would ask people to become members and finance their services through member fees. The announcement of the new organization fell right into the negotiations of the coalition agreement between Christian Democrats and the Liberal Party (FDP) for a new government. While the issue had not been part of the Christian Democratic campaign manifesto, the issue did make it into this coalition agreement.[[4]](#footnote-4) Specifically, the coalition partners pronounced their intention to prohibit commercial services related to assisted dying.[[5]](#footnote-5) This formulation represented a compromise between the Christian Democratic position and the more liberal position of the FDP, which had in fact formulated the need to better help families taking care of dying people in their ability to support this process of dying.[[6]](#footnote-6) While this formulation remained rather vague, it was clear that the FDP preferred a more liberal approach. Quite prominently, Sabine Leutheusser-Schnarrenberger, as designated Secretary of Justice for the FDP, had spoken out publicly not only in favour of assisted-dying but even in support of active euthanasia under specific circumstances.[[7]](#footnote-7) Prohibiting commercial services related to assisted-dying would basically outlaw pay-for-service offerings that attracted most criticism. Yet, prohibiting all forms of organized services related to assisted dying was seen to be even more restrictive as it affected anyone (including doctors) that would support people in realizing their wish to die more than just once. The resulting legislative proposal was not drafted until 2012 and in fact never became law. The initial draft was presented to the *Bundesrat* on 13 November 2012, where the state governments abstained from formulating a position on the draft and directly sent it back to the first chamber (*Bundestag*).[[8]](#footnote-8) Overall, the government coalition acted just like one would expect a government coalition led by a Christian Democratic party to act in such a situation. While the restrictive proposal was drafted, the coalition invested heavily into keeping attention to a rather low level. The first debate of the draft took place in the Bundestag on a Thursday night just before midnight and took only five minutes. No oral speeches were given and the proposal was directly submitted to the competent committee.[[9]](#footnote-9) The attempt to adopt a moderately restrictive reform without high levels of attention and public spotlight failed, however. This was particularly due to criticism voiced from within the Christian Democratic party.[[10]](#footnote-10) Only one week after the initial presentation to the Bundestag, Julia Klöckner and the regional party group of Rheinland-Pfalz (*Landesverband Rheinland-Pfalz*) used the Christian Democrats’ annual federal convention to discuss the issue and demand a vote on an alternative proposal which would outlaw not only commercial services but all kinds of organized – commercial and non-commercial – related to assisted suicide.[[11]](#footnote-11)[[12]](#footnote-12) The proposal was adopted.[[13]](#footnote-13) While this decision of the convention did make it into the Christian Democratic party manifesto for the federal election campaign 2013,[[14]](#footnote-14) it also led to the tabling of the initial proposal in the committee until after that election and the disappearance of the issue from the political agenda for another year.[[15]](#footnote-15) The prohibition of services related to assisted suicide was not part of the negotiations of a coalition agreement between the Christian Democrats and the Social Democrats, which were about to form a grand coalition.[[16]](#footnote-16) While the provision was not part of the eventual coalition agreement between the Christian Democrats and the FDP in 2013, it was the Christian Democratic Secretary of Health, Herrmann Gröhe, who announced in January of 2014 the political will to finally tackle the issue.[[17]](#footnote-17) Subsequently, a legislative proposal was introduced as a private members’ bill (*Gruppenantrag*) promoted by two sponsors that were relatively unknown among the German public and attracted support across party lines.

Overall, the Christian Democrat’s role in the adoption of §217 of the German penal code thus supports the theoretical considerations discussed in this paper: the policy trajectory reflects the internal ambivalence of the party characterized by tension created by restrictive policy preferences on the one side and the ambition to appeal to secularized median voters on the other side. The party is able to resolve this tension by actively trying to dissociate the party as such from the reform proposal.

Until 2014, party leadership of the Christian Democratic party at the federal level repeatedly tried to keep the issue off the agenda and attention levels low. When the issue first came up in 2007 in response to Roger Kusch, some parts of the party – three state governments – presented an initial legislative proposal, which found little interest and not further support by the federal party leadership. The party basically tried to keep the issue out of the 2009 election campaign and only included the issue in the eventual coalition agreement negotiated after the election in response to a renewed effort by Kusch to organize assisted-dying services. But even then, the issue was treated with little priority and it took another three years until a first bill was drafted. Yet, even for this bill, which represented a rather moderate restriction of the status quo, Christian Democratic leadership found it hardly opportune to push for public attention and a strong politicization of the issue. On the contrary, it basically suppressed public debate in the Bundestag. When criticism from within the party came to the surface – and to the public’s attention – at the annual federal party convention, the issue was quickly tabled and pulled out of the public spotlight. This behaviour reflects the arguments that restrictive morality policy reforms will hardly be politically opportune for Christian Democrats. They risk to attract applause from the religious right, which can undermine the party’s investment into its unsecular party image (Engeli et al. 2012, van Kersbergen 1999). Subsequent efforts to take the public spotlight off the issue are just what should be expected in such a situation. Only the subsequent strategy of promoting a restriction through a private members’ bill (promoted by relatively unknown sponsors that also attracted support from members of other parties and was discussed in a rather depoliticized tone) made it possible to balance the interests of critiques from the religious right from within the party and outside the party that strongly opposed assisted suicide with the party’s overarching goal of not risking its unsecular platform. The combination of aspired reform direction and the peculiar role of Christian Democrats created the kinds of politics that made this restriction only possible with the help of such a blame-avoidance strategy.

1. Jansen, Maike. 2008. Kuschs grüner Kasten bringt den Tod. *Spiegel Online* [Online]. Available: http://www.spiegel.de/politik/deutschland/sterbehilfe-kuschs-gruener-kasten-bringt-den-tod-a-543963.html [Accessed 28.03.2008]. [↑](#footnote-ref-1)
2. Interessengemeinschaft Kritische Bioethik Bayern. 2008. Bundesrat beriet über Verbot kommerzieller und organisierter Suizidhilfe. Available: https://www.sterbehilfe-debatte.de/neues/archiv-2008/07-07-08-bundesrat-verbot-kommerzieller-und-organisierter-suizidhilfe/. [↑](#footnote-ref-2)
3. CDU/CSU. 2009. Wir haben die Kraft – Gemeinsam für unser Land. Regierungsprogramm 2009 – 2013. Available: https://www.hss.de/fileadmin/user_upload/HSS/Dokumente/ACSP/Bundestagswahlen/BTW-2009.pdf [Accessed 7 June 2018]. [↑](#footnote-ref-3)
4. Lutz, Martin. 2009. CDU und FDP richten sich auf eine Nachtsitzung ein. *Welt* [Online]. Available: https://www.welt.de/politik/bundestagswahl/article4880283/CDU-und-FDP-richten-sich-auf-eine-Nachtsitzung-ein.html [Accessed 8 June 2018]. [↑](#footnote-ref-4)
5. Interessengemeinschaft Kritische Bioethik Bayern. 2009. Koalitionsvereinbarung: Strafe für gewerbsmäßige Vermittlung von Gelegenheiten zur Selbsttötung. Available: https://www.sterbehilfe-debatte.de/neues/archiv-2009/25-10-09-koalitionsvereinbarung-strafe-fuer-gewerbsmaessige-vermittlung-von-gelegenheiten-zur-selbsttoetung/ [Accessed 1 June 2018]. [↑](#footnote-ref-5)
6. Bundesparteitag Der Freien Demokratischen Partei. 2009. „Die Mitte stärken. Deutschlandprogramm der Freien Demokratischen Partei“. Available: https://www.freiheit.org/sites/default/files/uploads/2017/03/02/in5-290btw2009deutschlandprogramm.pdf [Accessed 8 June 2018]. [↑](#footnote-ref-6)
7. Peter, Joachim. 2005. Leutheusser-Schnarrenberger für Zulassung der aktiven Sterbehilfe. *Welt* [Online]. Available: https://www.welt.de/print-welt/article172152/Leutheusser-Schnarrenberger-fuer-Zulassung-der-aktiven-Sterbehilfe.html [Accessed 6 June 2018]. [↑](#footnote-ref-7)
8. Interessengemeinschaft Kritische Bioethik Bayern. 2012. Bundesrat berät über Verbot der Suizidbeihilfe: Länderinitiative abgelehnt – keine Stellungnahme zum Regierungsgesetzentwurf. Available: https://www.sterbehilfe-debatte.de/neues/archiv-2012/12-10-12-bundesratberatung-gesetzentwurf-suizidbeihilfe-verbot/ [Accessed 28 May 2018]. [↑](#footnote-ref-8)
9. Interessengemeinschaft Kritische Bioethik Bayern. 2012. (Keine) Erste Bundestags-Beratung zu Gesetzentwurf zur Strafbarkeit der gewerbsmäßigen Förderung der Selbsttötung. Available: https://www.sterbehilfe-debatte.de/neues/archiv-2012/30-11-12-erste-bundestags-beratung-zu-gesetzentwurf-zur-strafbarkeit-der-gewerbsmaessigen-foerderung-der-selbsttoetung/ [Accessed 8 June 2018]. [↑](#footnote-ref-9)
10. Alexander, Robin. 2013. Ein Gesetz, an der Realität vorbei konstruiert. *Welt* [Online]. Available: https://www.welt.de/politik/deutschland/article112819216/Ein-Gesetz-an-der-Realitaet-vorbei-konstruiert.html. [↑](#footnote-ref-10)
11. dpa. 2012. CDU-Vize Klöckner gegen Sterbehilfegesetz. *RP Online* [Online]. Available: https://rp-online.de/politik/cdu-vize-kloeckner-gegen-sterbehilfegesetz_aid-13888017 [Accessed 8 June 2018]. [↑](#footnote-ref-11)
12. Alexander, Robin. 2012. Dieses Gesetz kann lebensgefährlich sein. *Welt* [Online]. Available: https://www.welt.de/politik/deutschland/article111955344/Dieses-Gesetz-kann-lebensgefaehrlich-sein.html [Accessed 8 June 2018]. [↑](#footnote-ref-12)
13. Interessengemeinschaft Kritische Bioethik Bayern. 2012. Bundesparteitag: Richtungsweisender CDU-Beschluss zu Sterbehilfe. Available: https://www.sterbehilfe-debatte.de/neues/archiv-2012/08-12-12-cdu-bundesparteitag-cdu-beschluss-zu-sterbehilfe/ [Accessed 25 May 2018]. [↑](#footnote-ref-13)
14. CDU/CSU. 2013. Gemeinsam erfolgreich für Deutschland. Regierungsprogramm 2013-2017. Available: https://www.cdu.de/sites/default/files/media/dokumente/regierungsprogramm-2013-2017-langfassung-20130911.pdf [Accessed 5 May 2018]. [↑](#footnote-ref-14)
15. CDU. 2014. Organisierte Sterbehilfe verbieten. Available: https://www.cdu.de/artikel/organisierte-sterbehilfe-verbieten [Accessed 1 June 2018]. [↑](#footnote-ref-15)
16. CDU, CSU & SPD. 2013. Deutschlands Zukunft gestalten. Koalitionsvertrag zwischen CDU, CSU und SPD. Available: https://www.bundesregierung.de/Content/DE/_Anlagen/2013/2013-12-17-koalitionsvertrag.pdf;jsessionid=BF7B3AD5CD1D6AA49428875A4FE655E2.s5t2?__blob=publicationFile&v=3 [Accessed 8 June 2018]. [↑](#footnote-ref-16)
17. SZ Aritkel: neue Debatte um Sterbehilfe: [↑](#footnote-ref-17)
